# Supplementary material for: Impact of COVID-19 pandemic on global urban expansion slowdown
Source: Research Square preprint supplement (doi:10.21203/rs.3.rs-3893976/v1), 2024-04-24

# Supplementary information

## Supplementary Notes

The time series urban impervious surface mapping results of all cities are provided.

Abbreviations and indicators meanings:

Africa-AF; Asia-AS; Europe-EU; North America-NA; Oceania-OA; South America-SA

$p_b$ : The  $p$  value of the regression between urban area and time before the pandemic (2018-2019);

$p_a$ : The  $p$  value of the regression between urban area and time after the pandemic (2020-2022);

$S_b$ : The slope of the regression between urban area and time before the pandemic (2018-2019);

$S_a$ : The slope of the regression between urban area and time after the pandemic (2020-2022).

## AF-Algeria

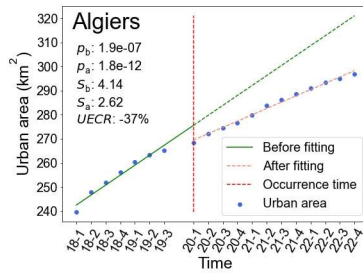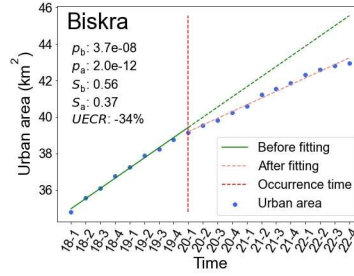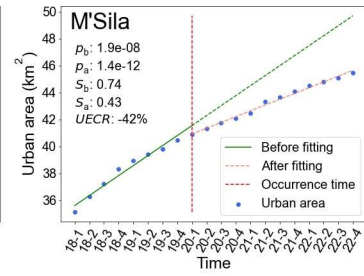

## AF-Angola

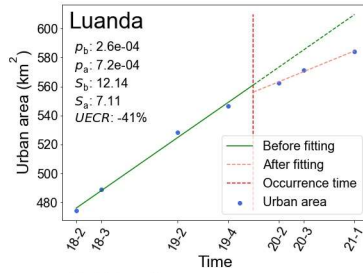

## AF-Benin

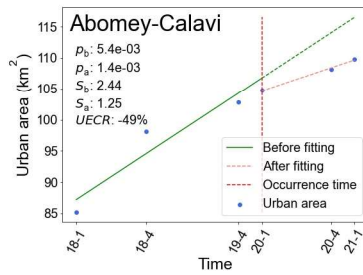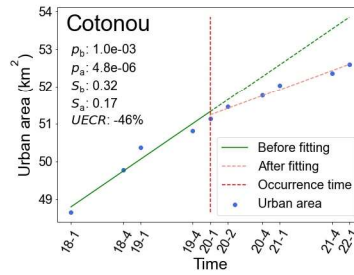

## AF-Botswana

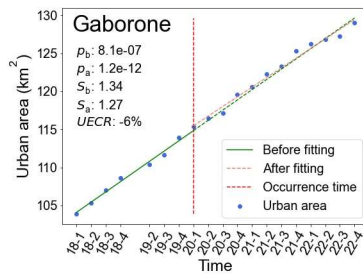

## AF-Burkina Faso

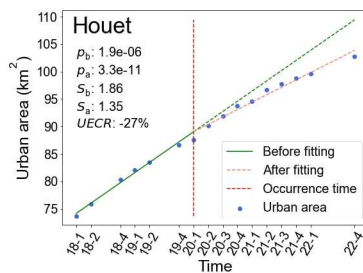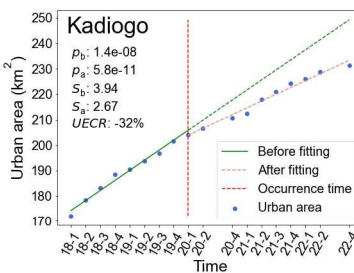

## AF-Côte d'Ivoire

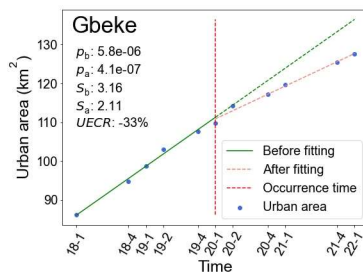

## AF-Cameroon

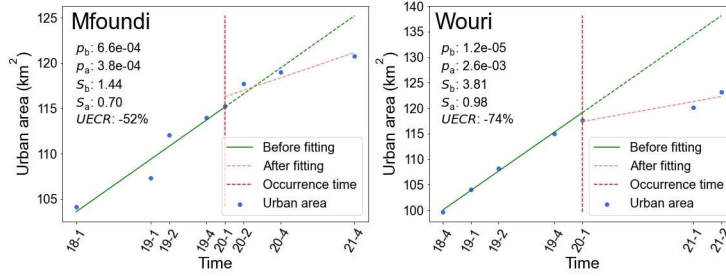

## AF-Central African Republic

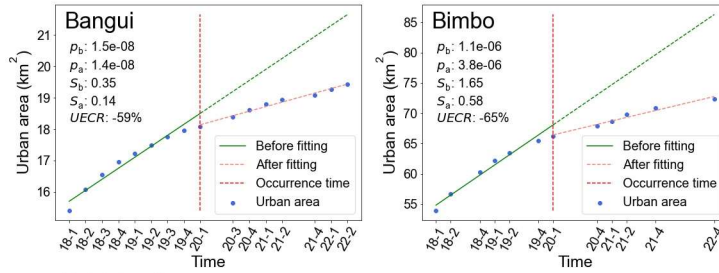

## AF-Chad

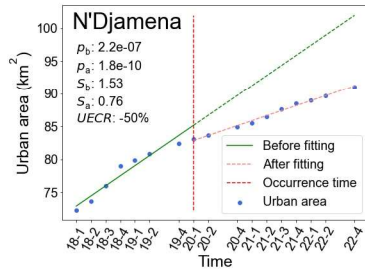

## AF-Democratic Republic of the Congo

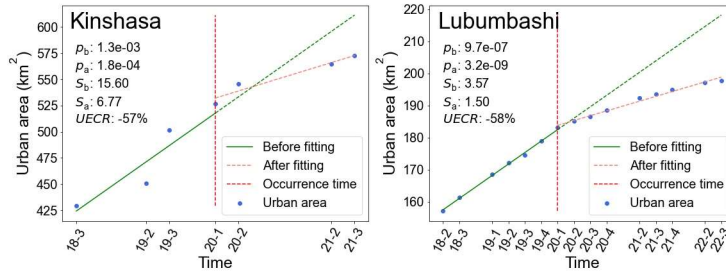

## AF-Egypt

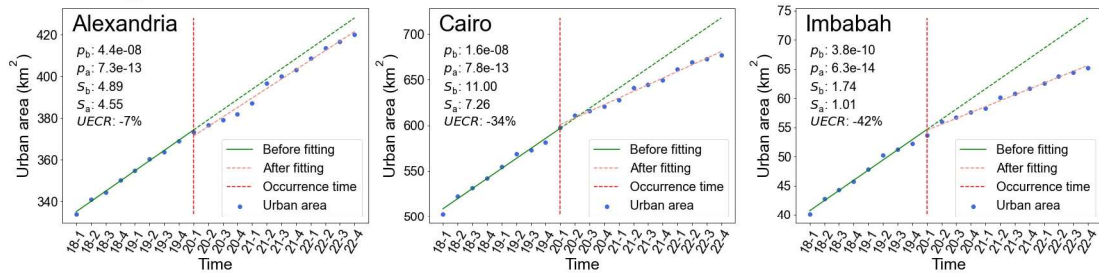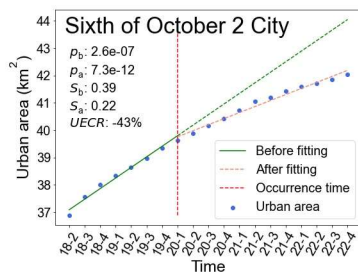

## AF-Ethiopia

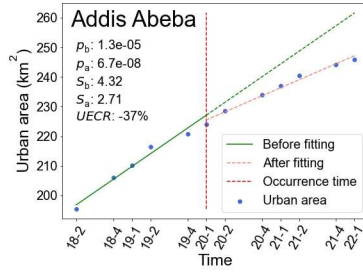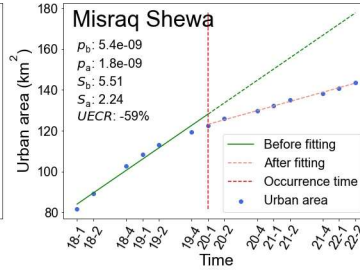

## AF-Ghana

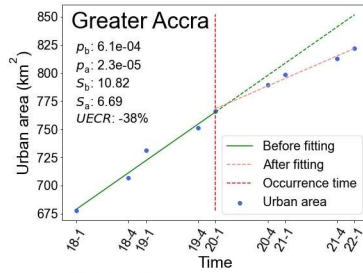

## AF-Guinea

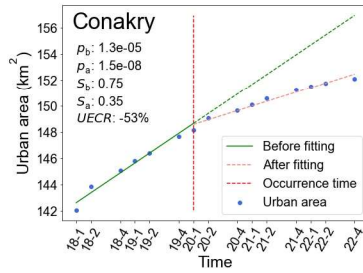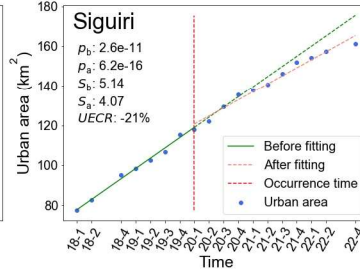

## AF-Guinea-Bissau

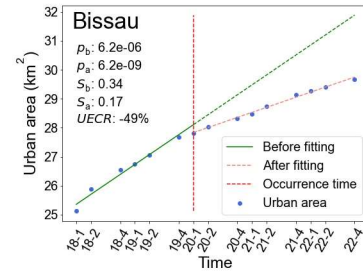

## AF-Kenya

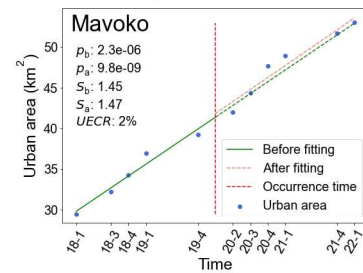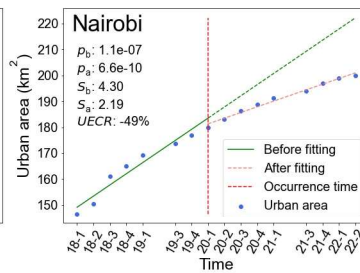

## AF-Lesotho

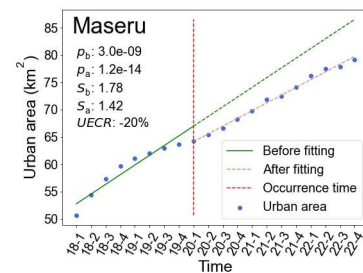

## AF-Liberia

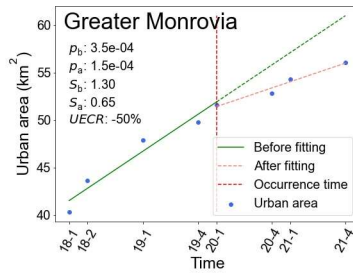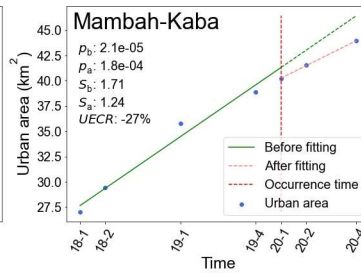

## AF-Madagascar

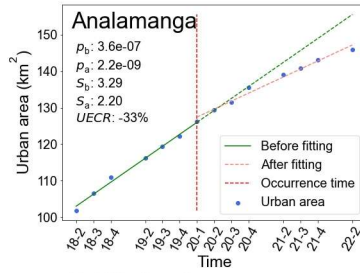

## AF-Malawi

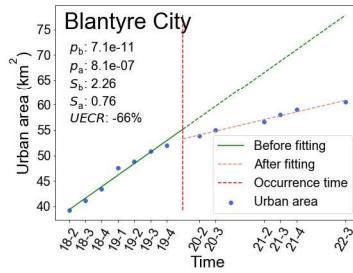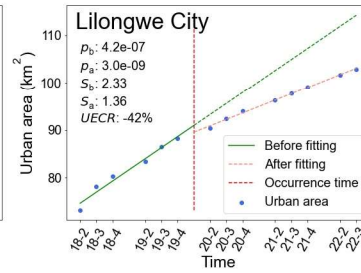

## AF-Mali

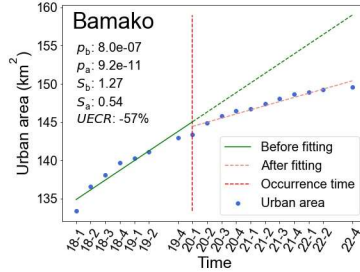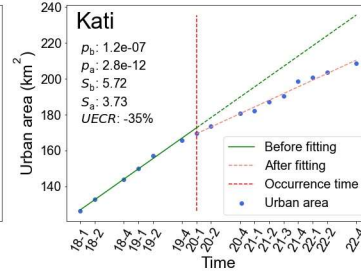

## AF-Mauritania

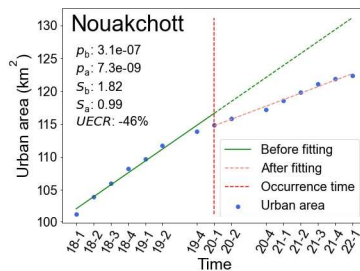

## AF-Morocco

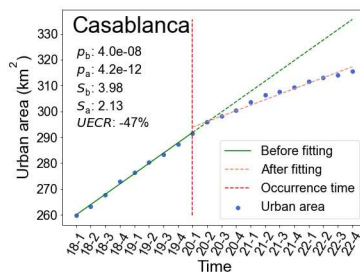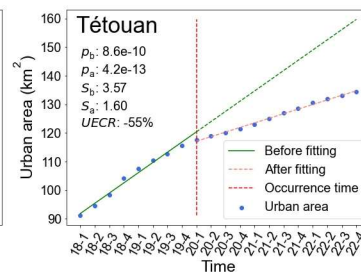

## AF-Mozambique

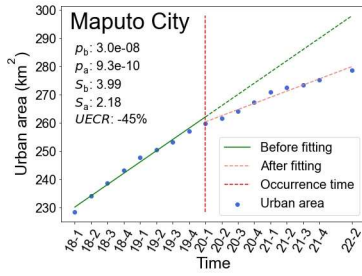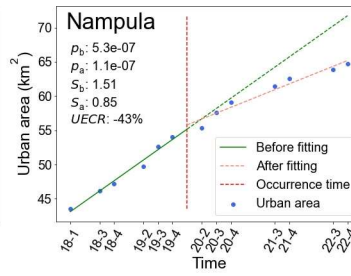

## AF-Namibia

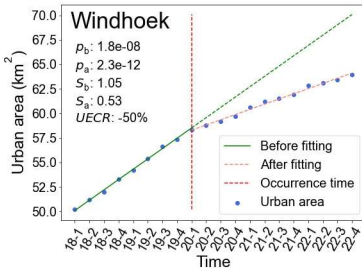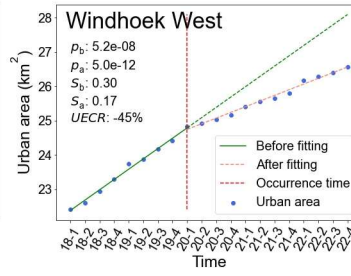

## AF-Niger

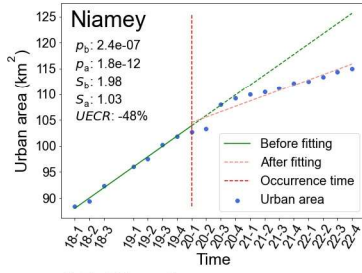

## AF-Nigeria

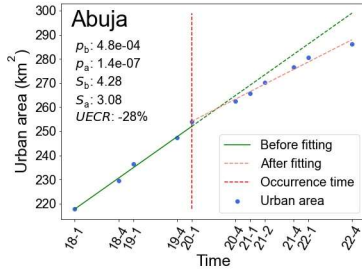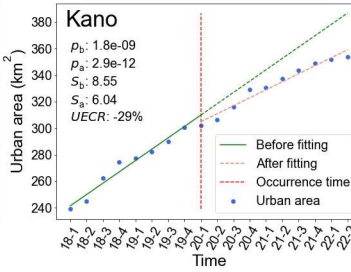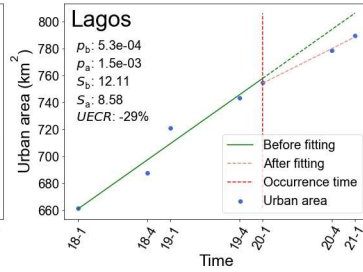

## AF-Portugal

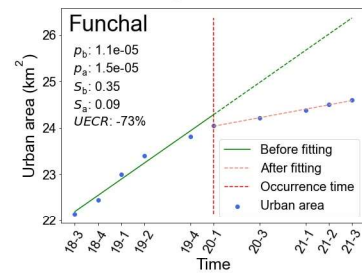

## AF-Republic of the Congo

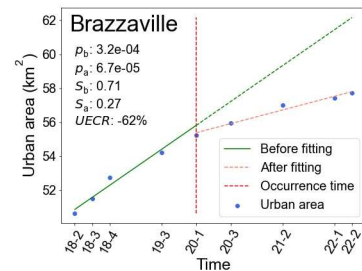

## AF-Rwanda

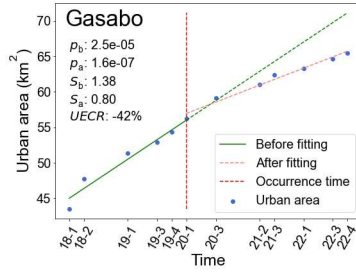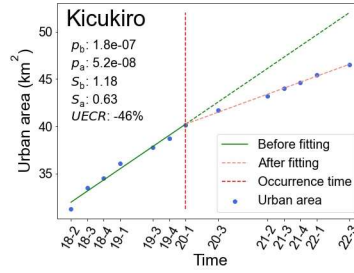

## AF-Senegal

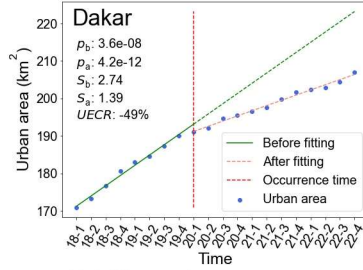

## AF-Sierra Leone

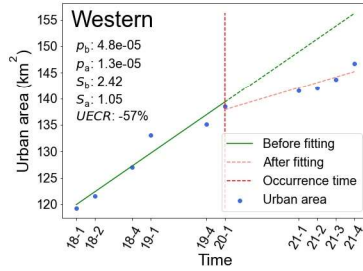

## AF-Somalia

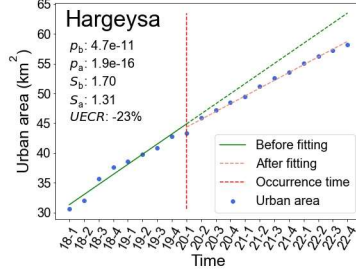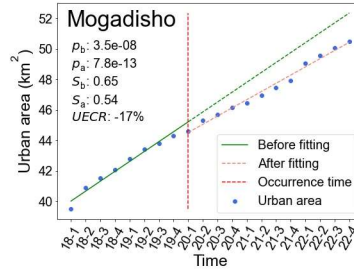

## AF-South Africa

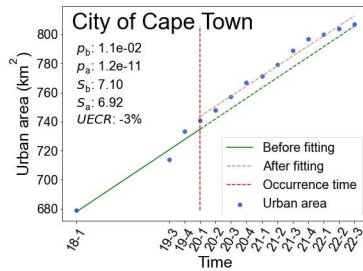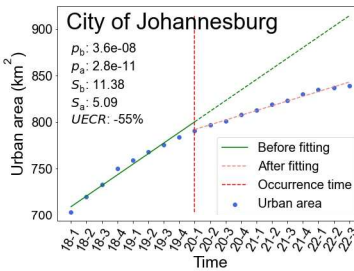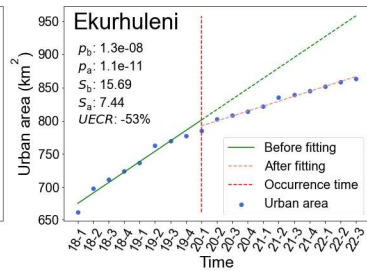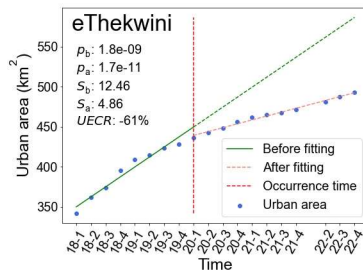

## AF-Spain

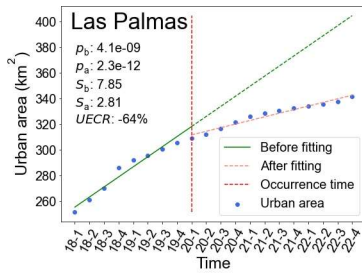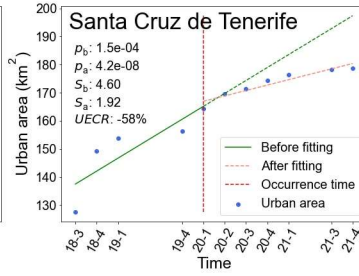

## AF-Sudan

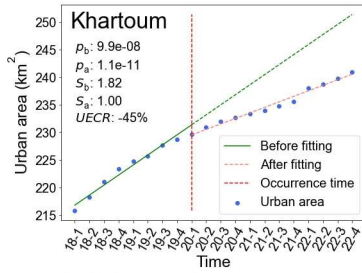

## AF-Tanzania

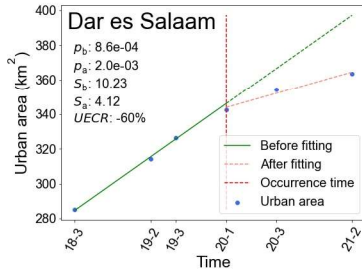

## AF-Togo

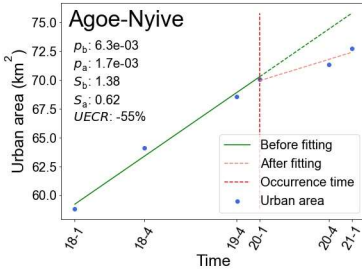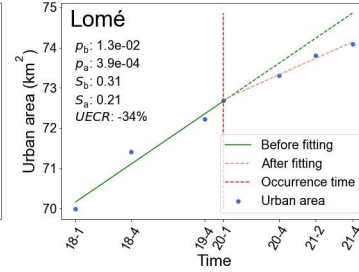

## AF-Tunisia

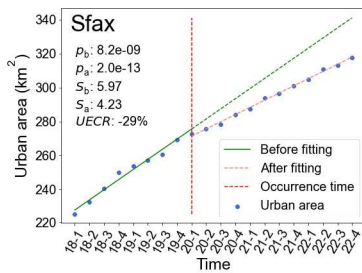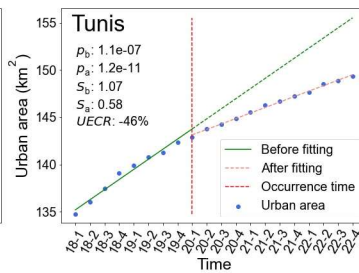

## AF-Uganda

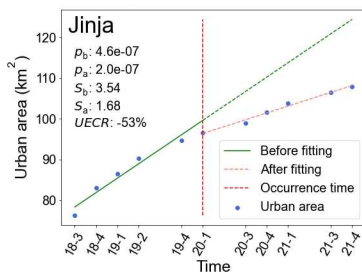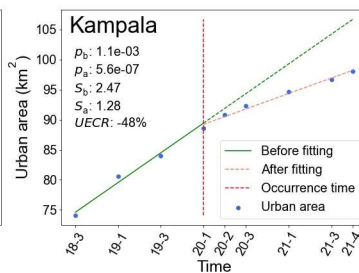

## AF-Zambia

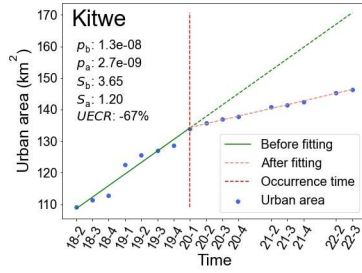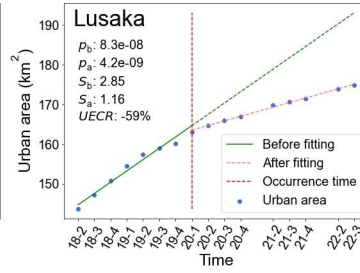

## AF-Zimbabwe

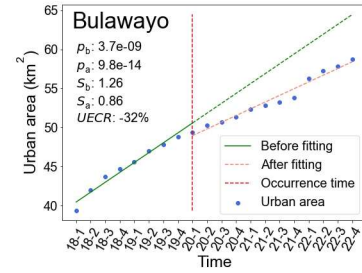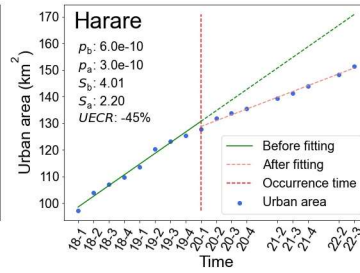

## AS-Afghanistan

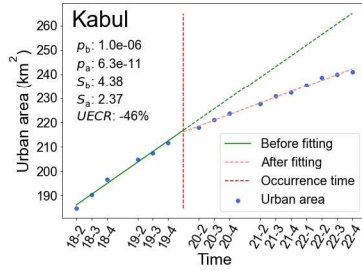

## AS-Armenia

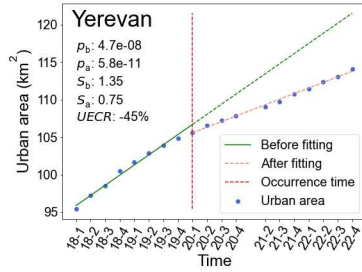

## AS-Azerbaijan

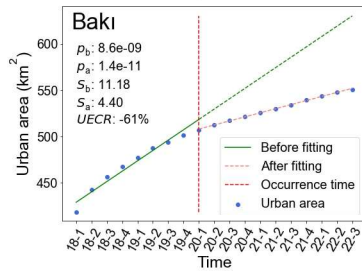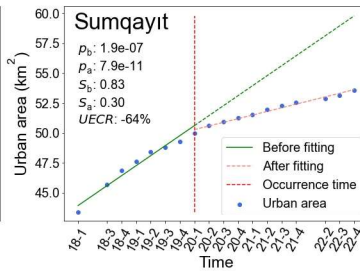

## AS-Bangladesh

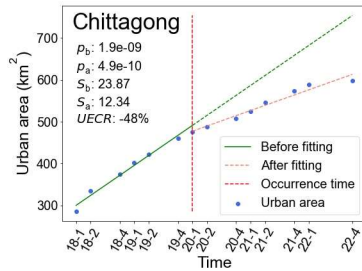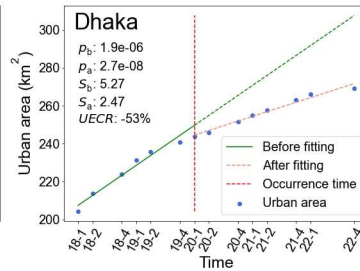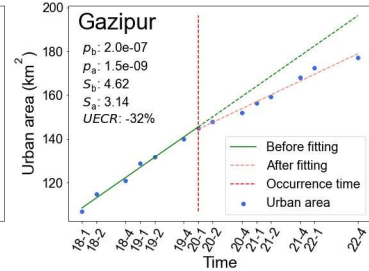

## AS-China

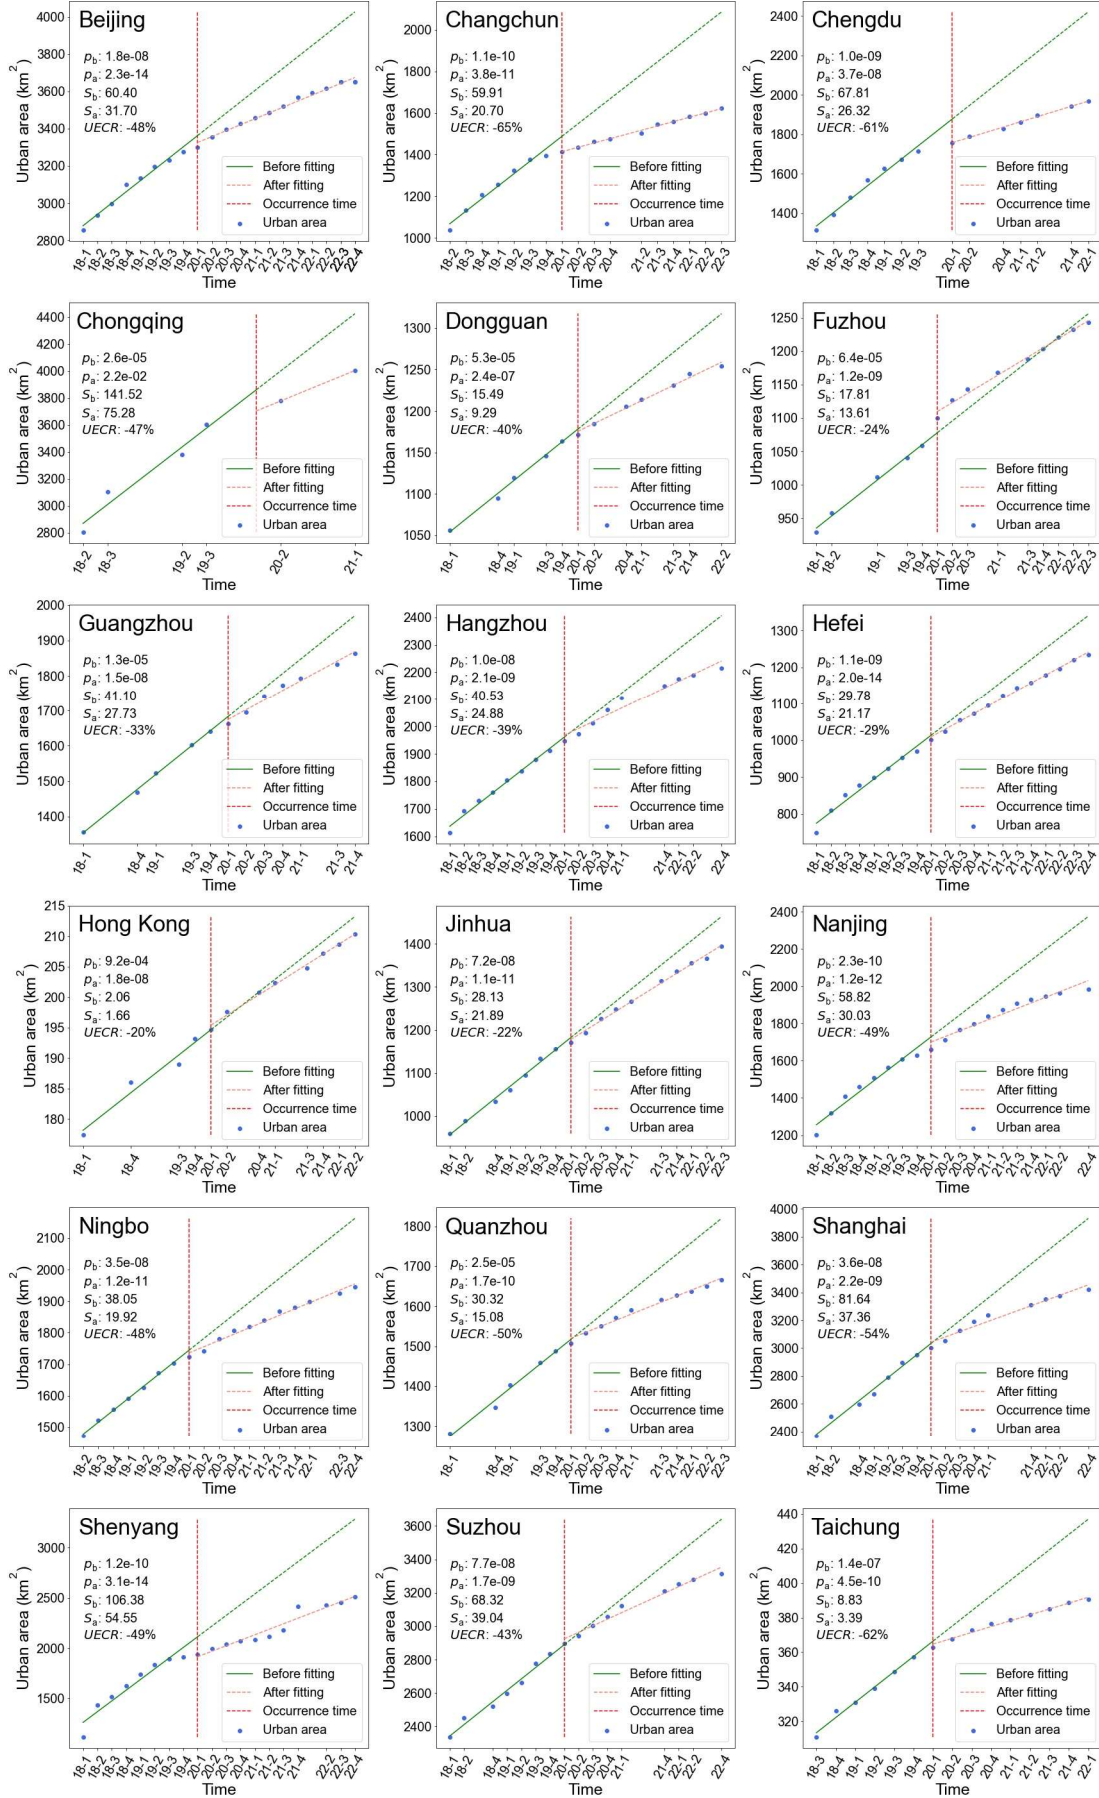

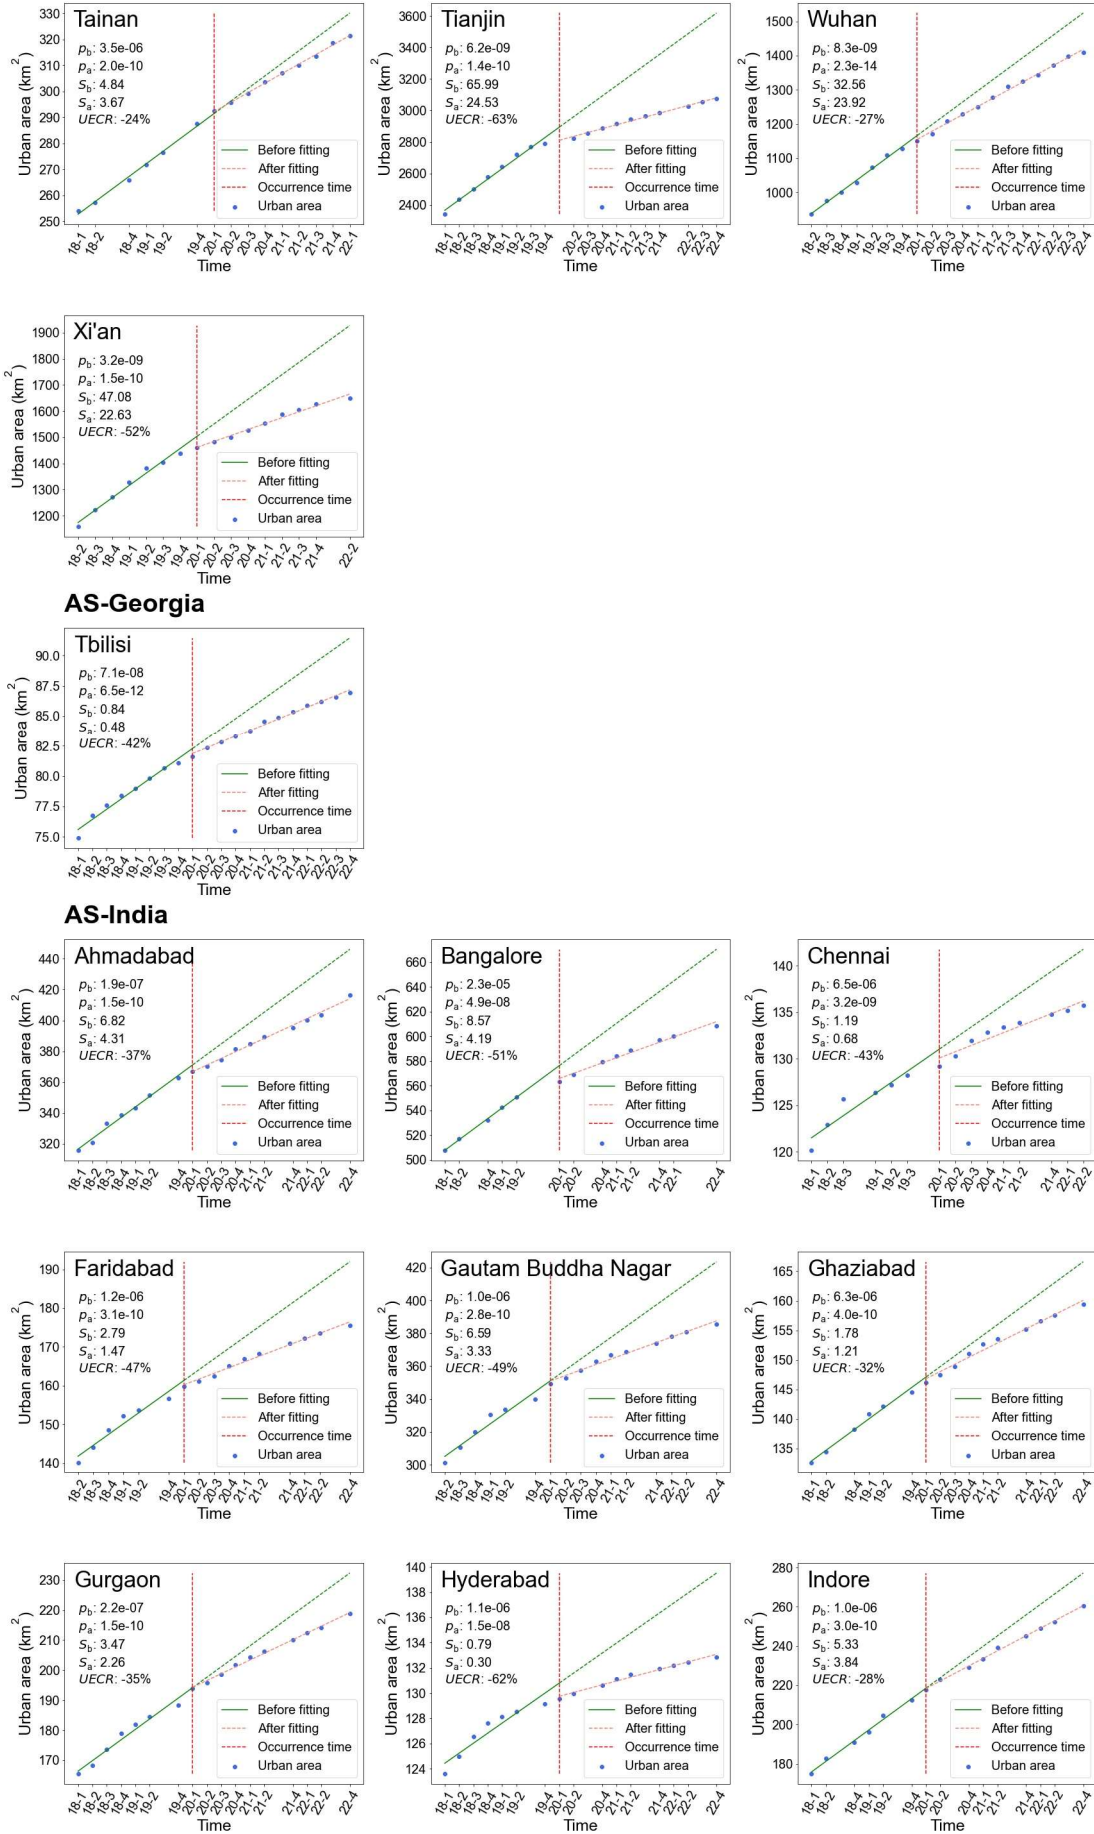

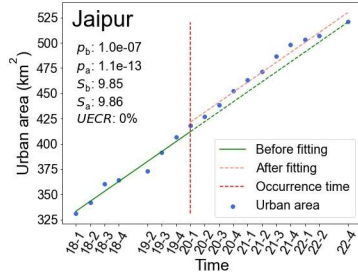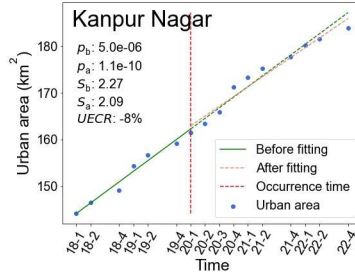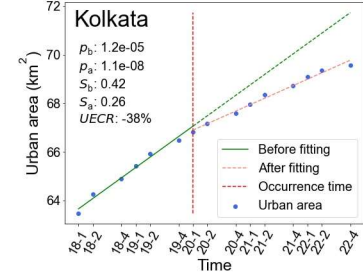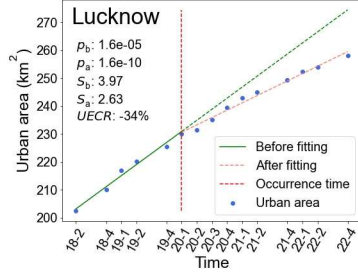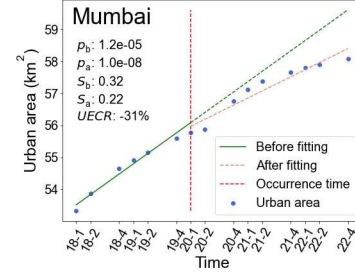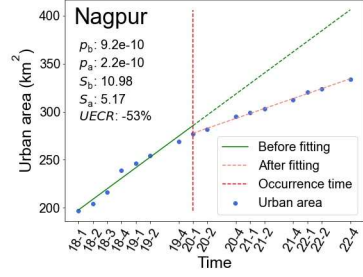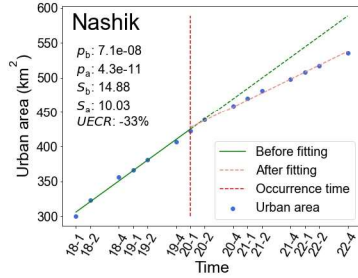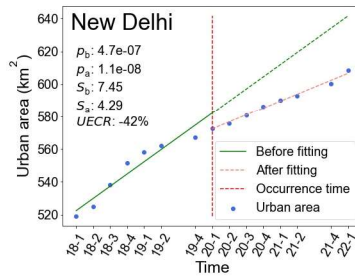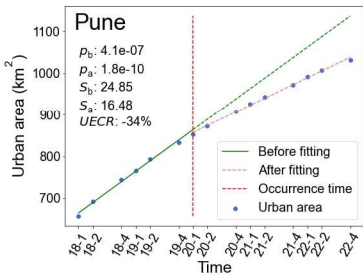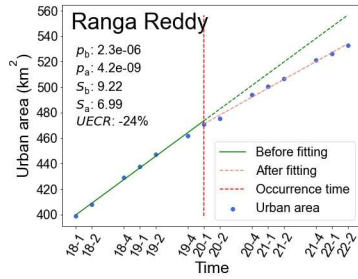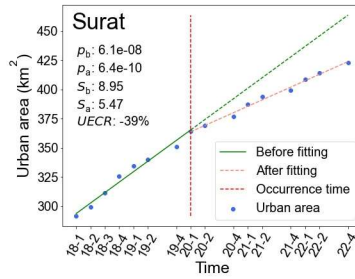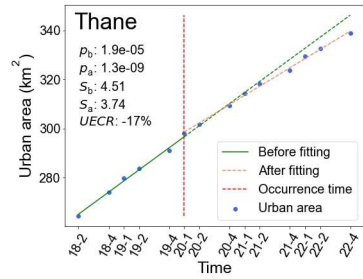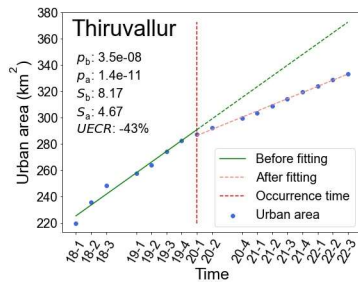

## AS-Indonesia

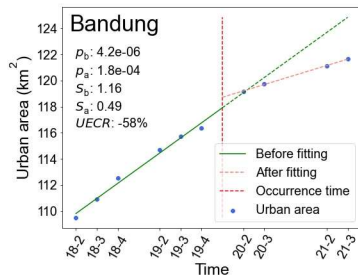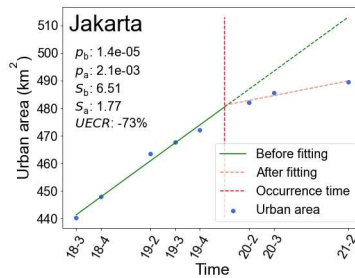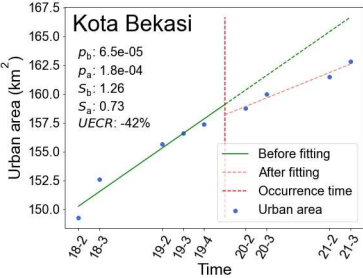

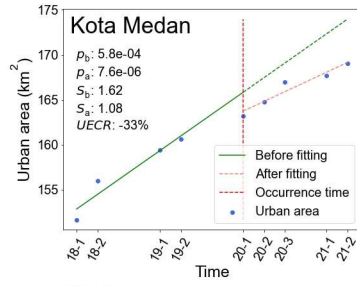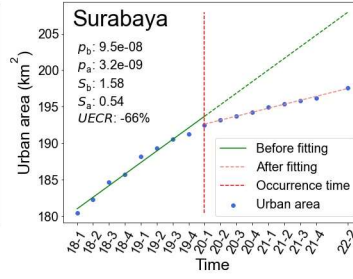

## AS-Iran

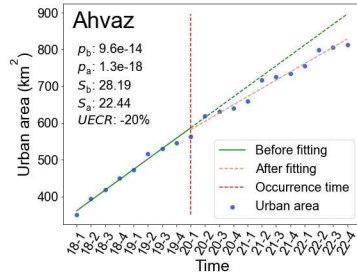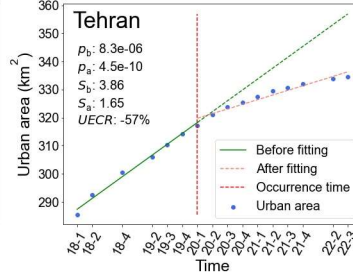

## AS-Iraq

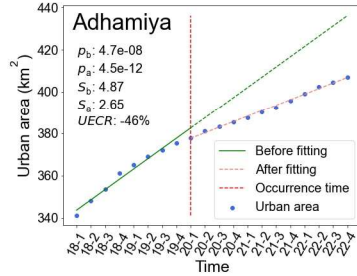

## AS-Israel

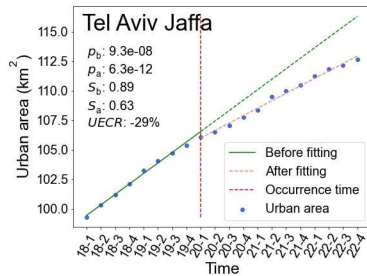

## AS-Japan

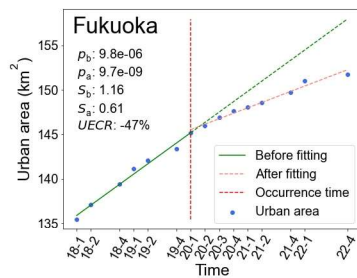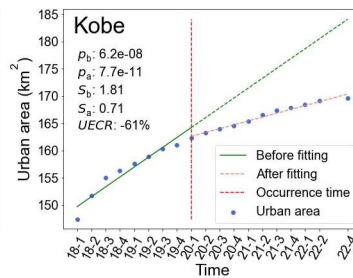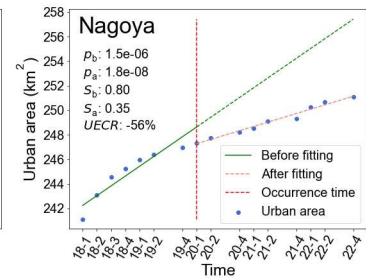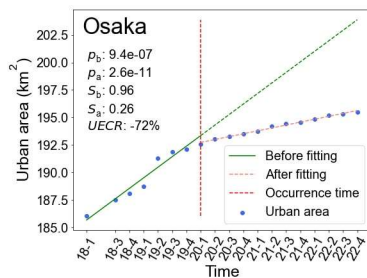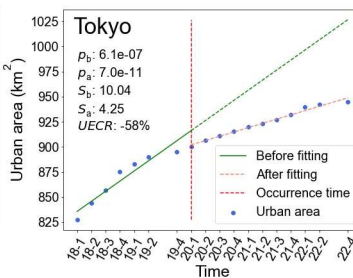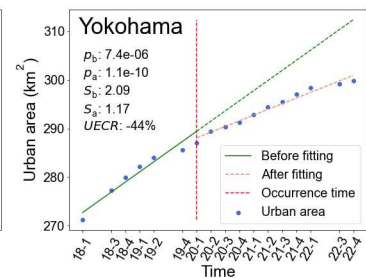

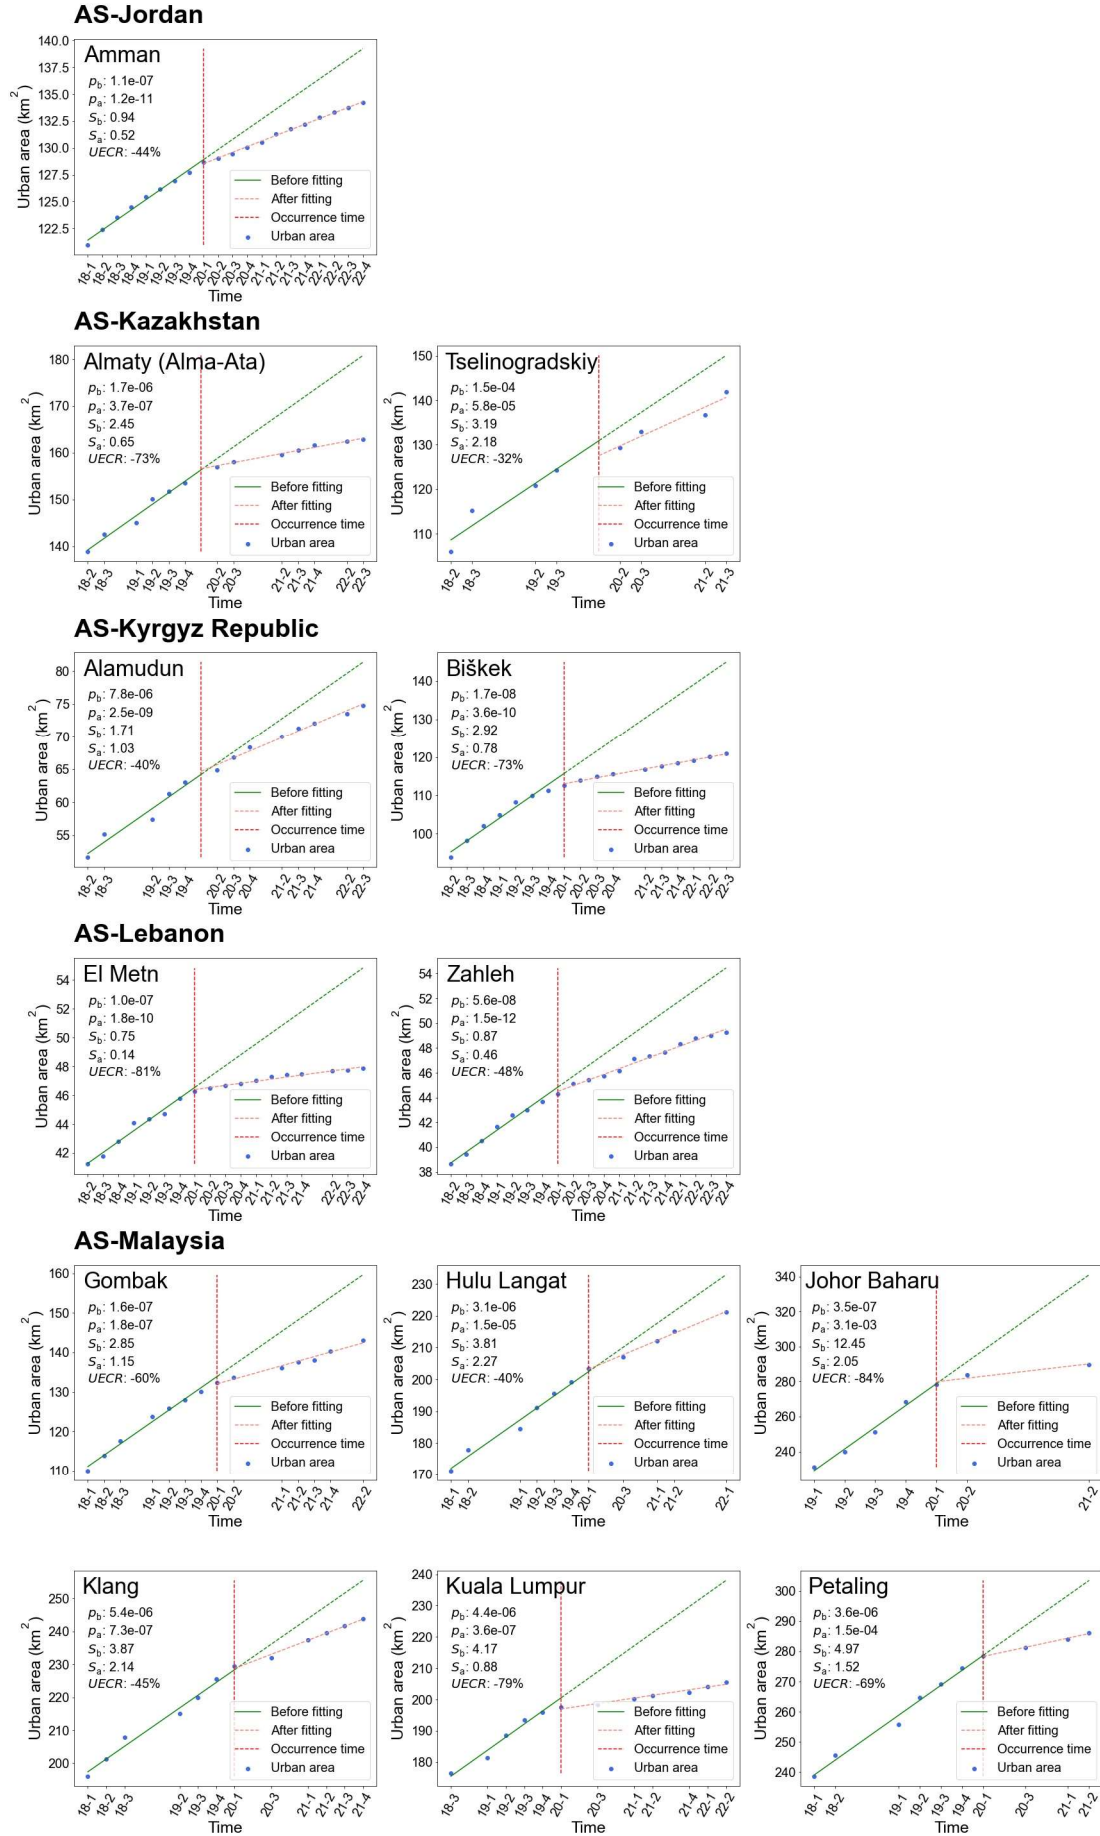

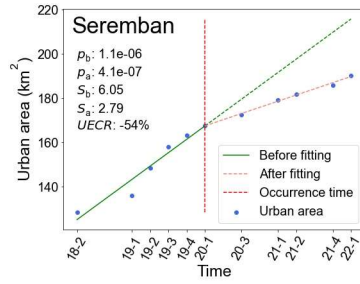

## AS-Mongolia

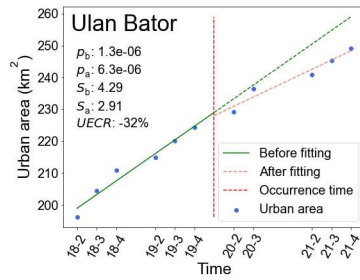

## AS-Myanmar

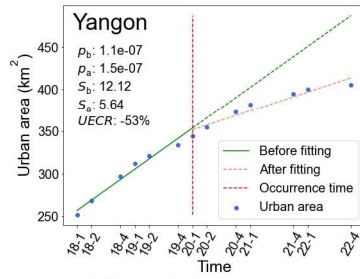

## AS-Nepal

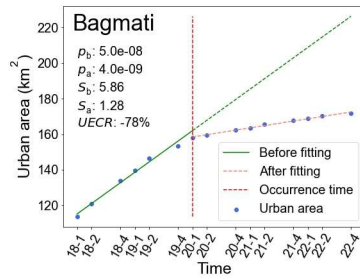

## AS-North Korea

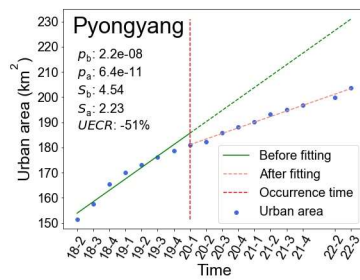

## AS-Pakistan

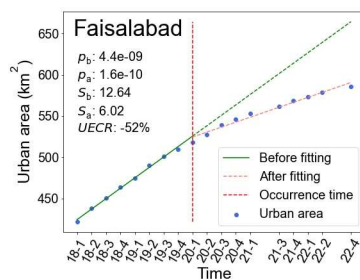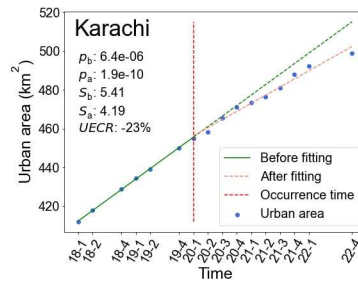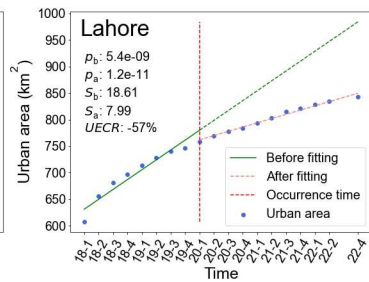

## AS-Palestine

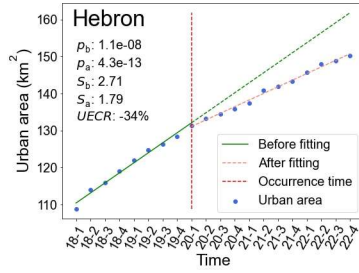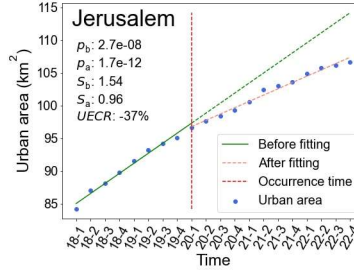

## AS-Philippines

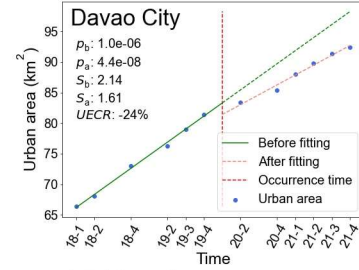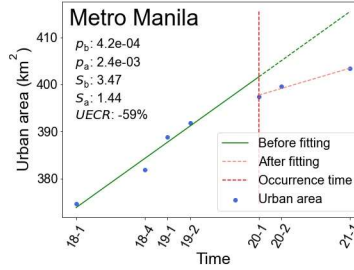

## AS-Russia

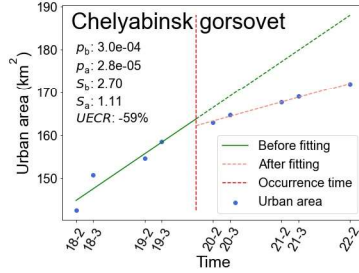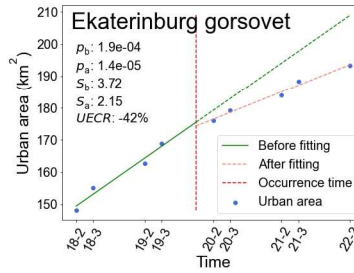

## AS-Saudi Arabia

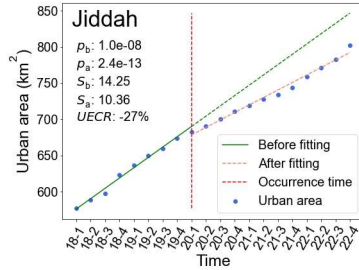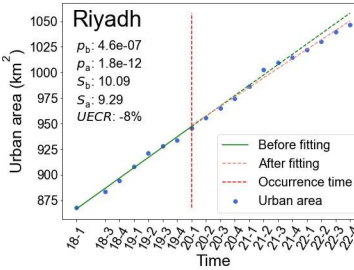

## AS-Singapore

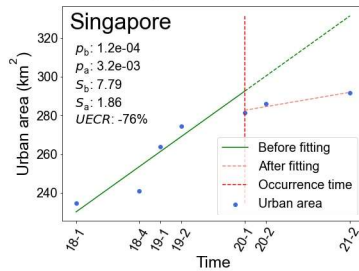

## AS-South Korea

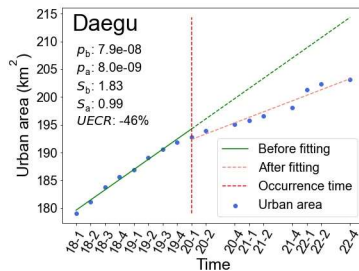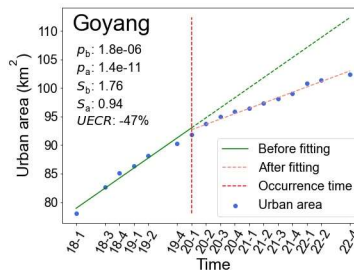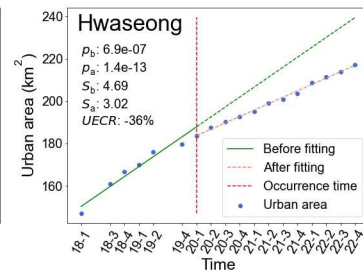

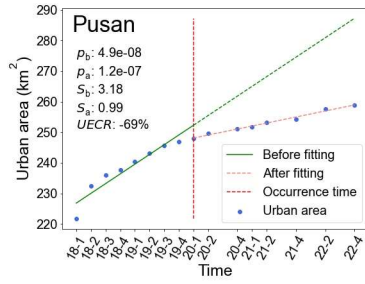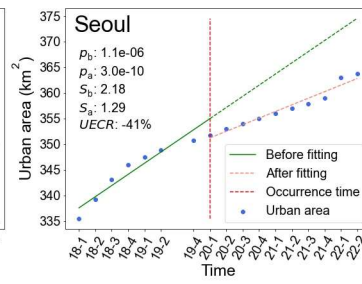

## AS-Syria

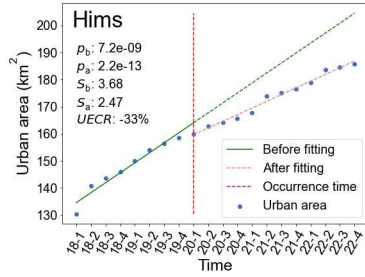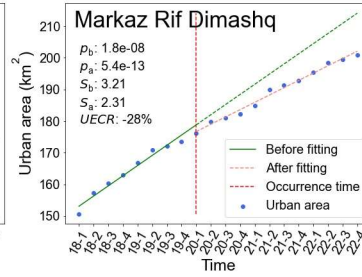

## AS-Tajikistan

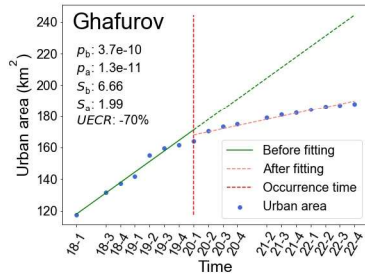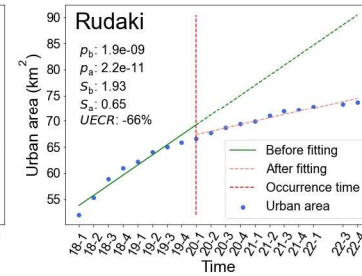

## AS-Thailand

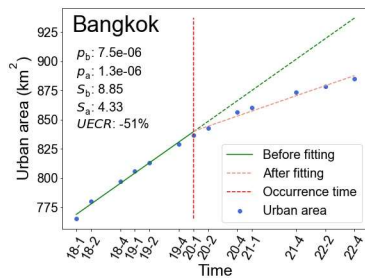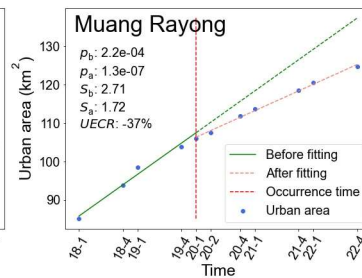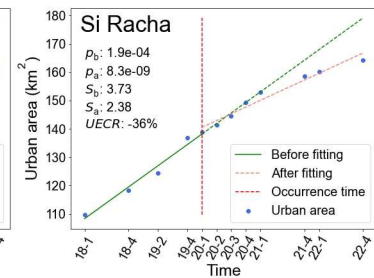

## AS-Turkey

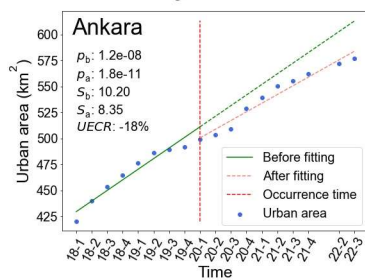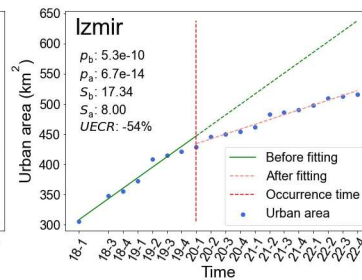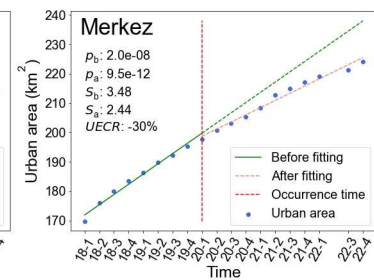

## AS-Turkmenistan

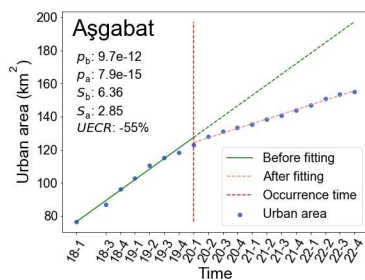

## AS-United Arab Emirates

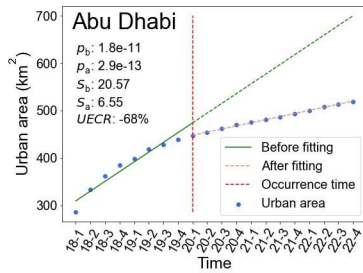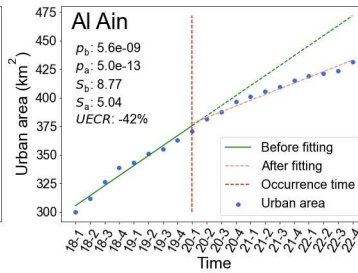

## AS-Uzbekistan

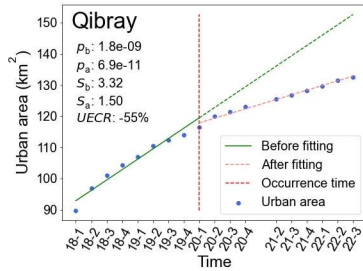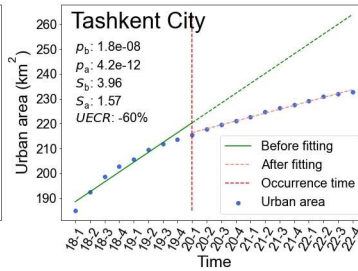

## AS-Vietnam

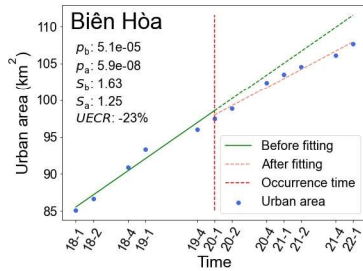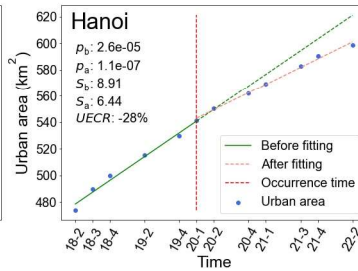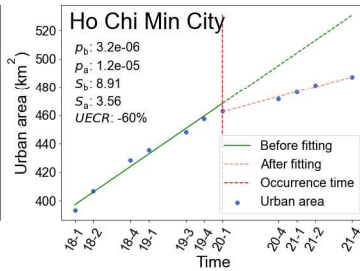

## EU-Albania

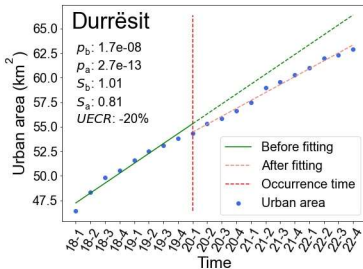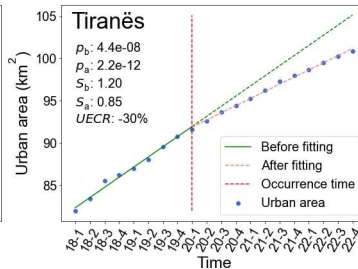

## EU-Austria

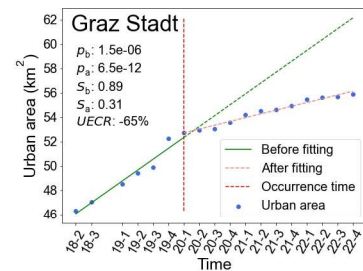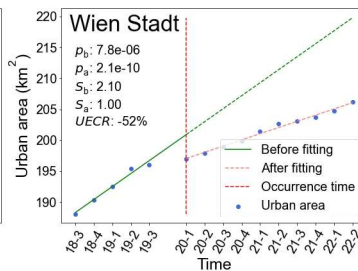

## EU-Belarus

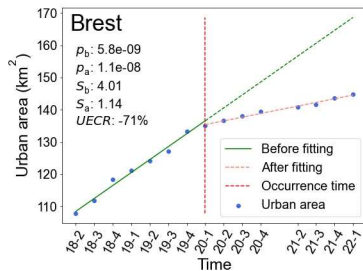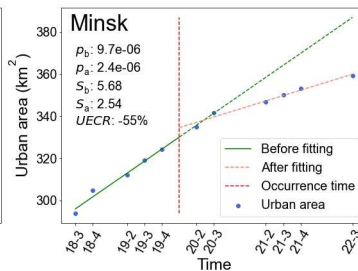

## EU-Belgium

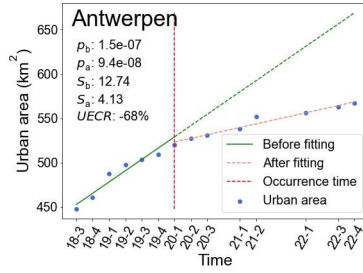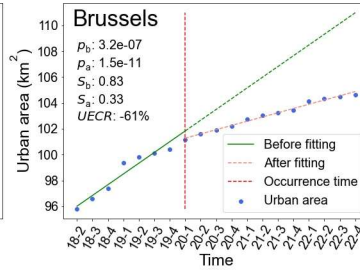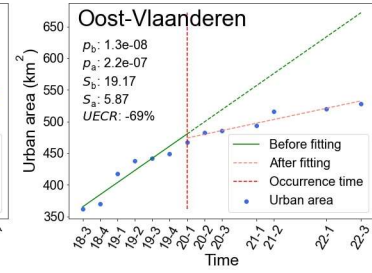

## EU-Bosnia and Herzegovina

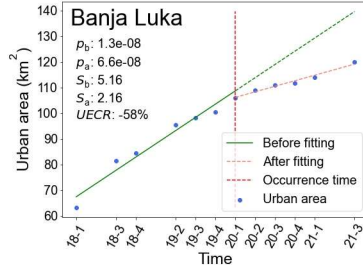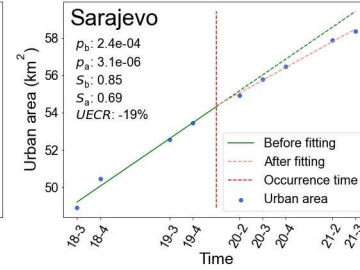

## EU-Bulgaria

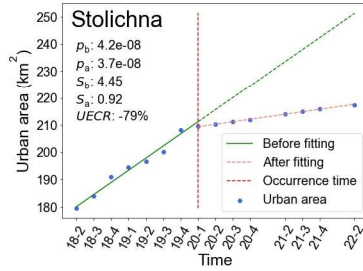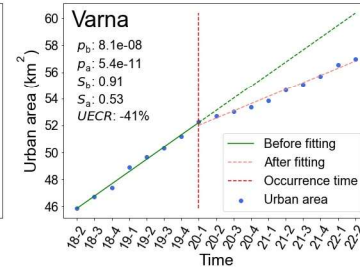

## EU-Croatia

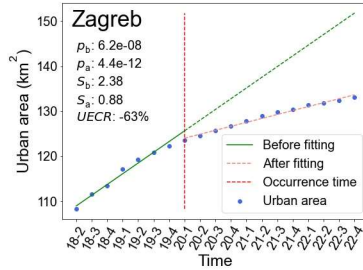

## EU-The Czech Republic

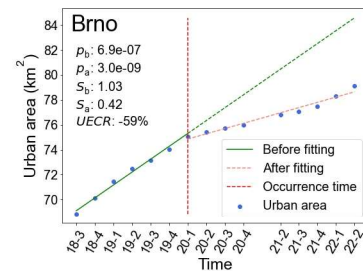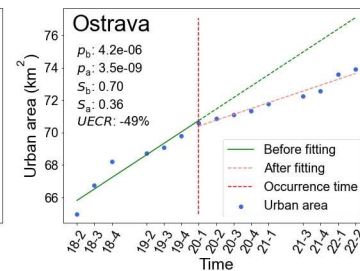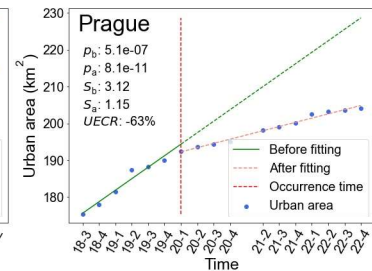

## EU-Denmark

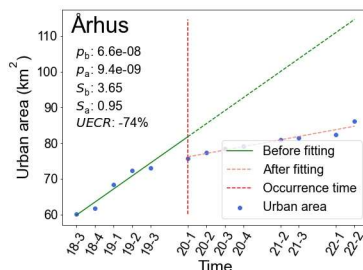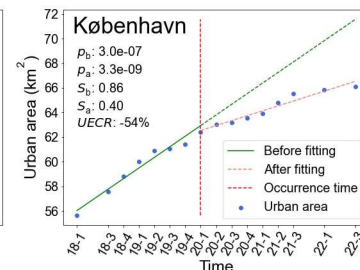

## EU-Estonia

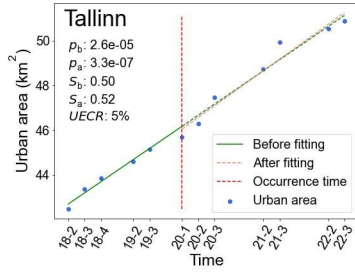

## EU-Finland

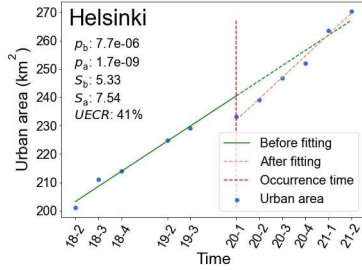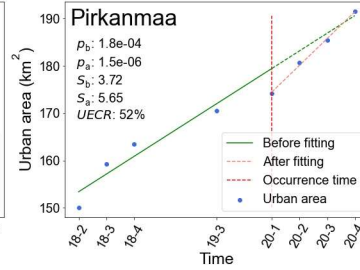

## EU-France

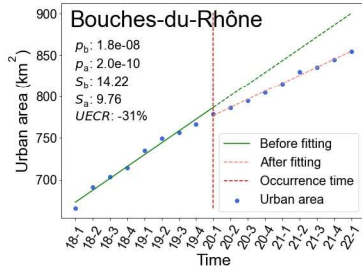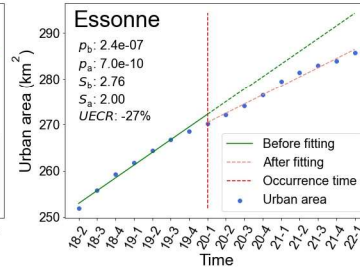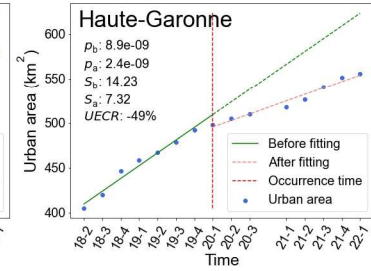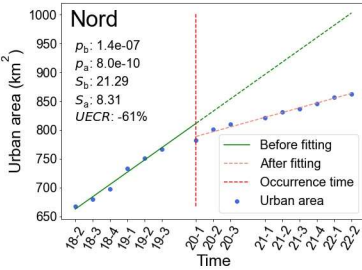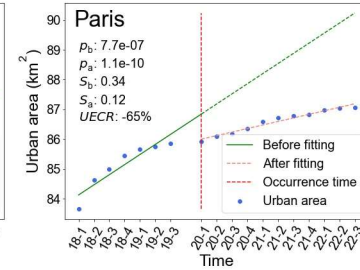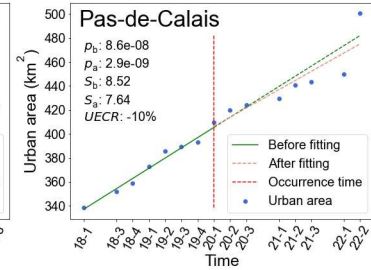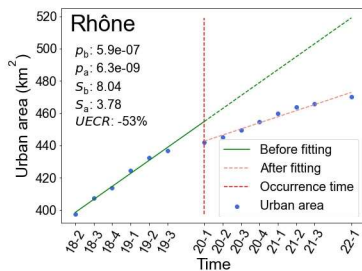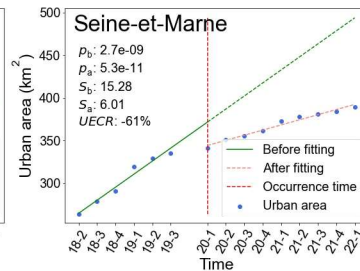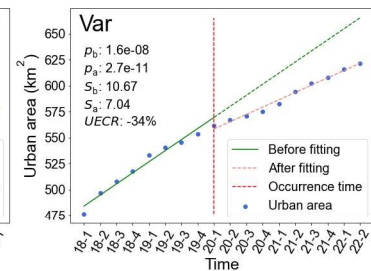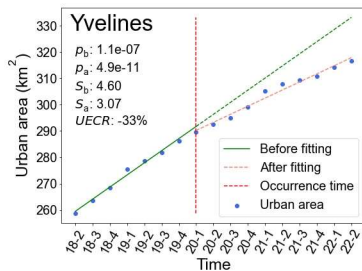

## EU-Germany

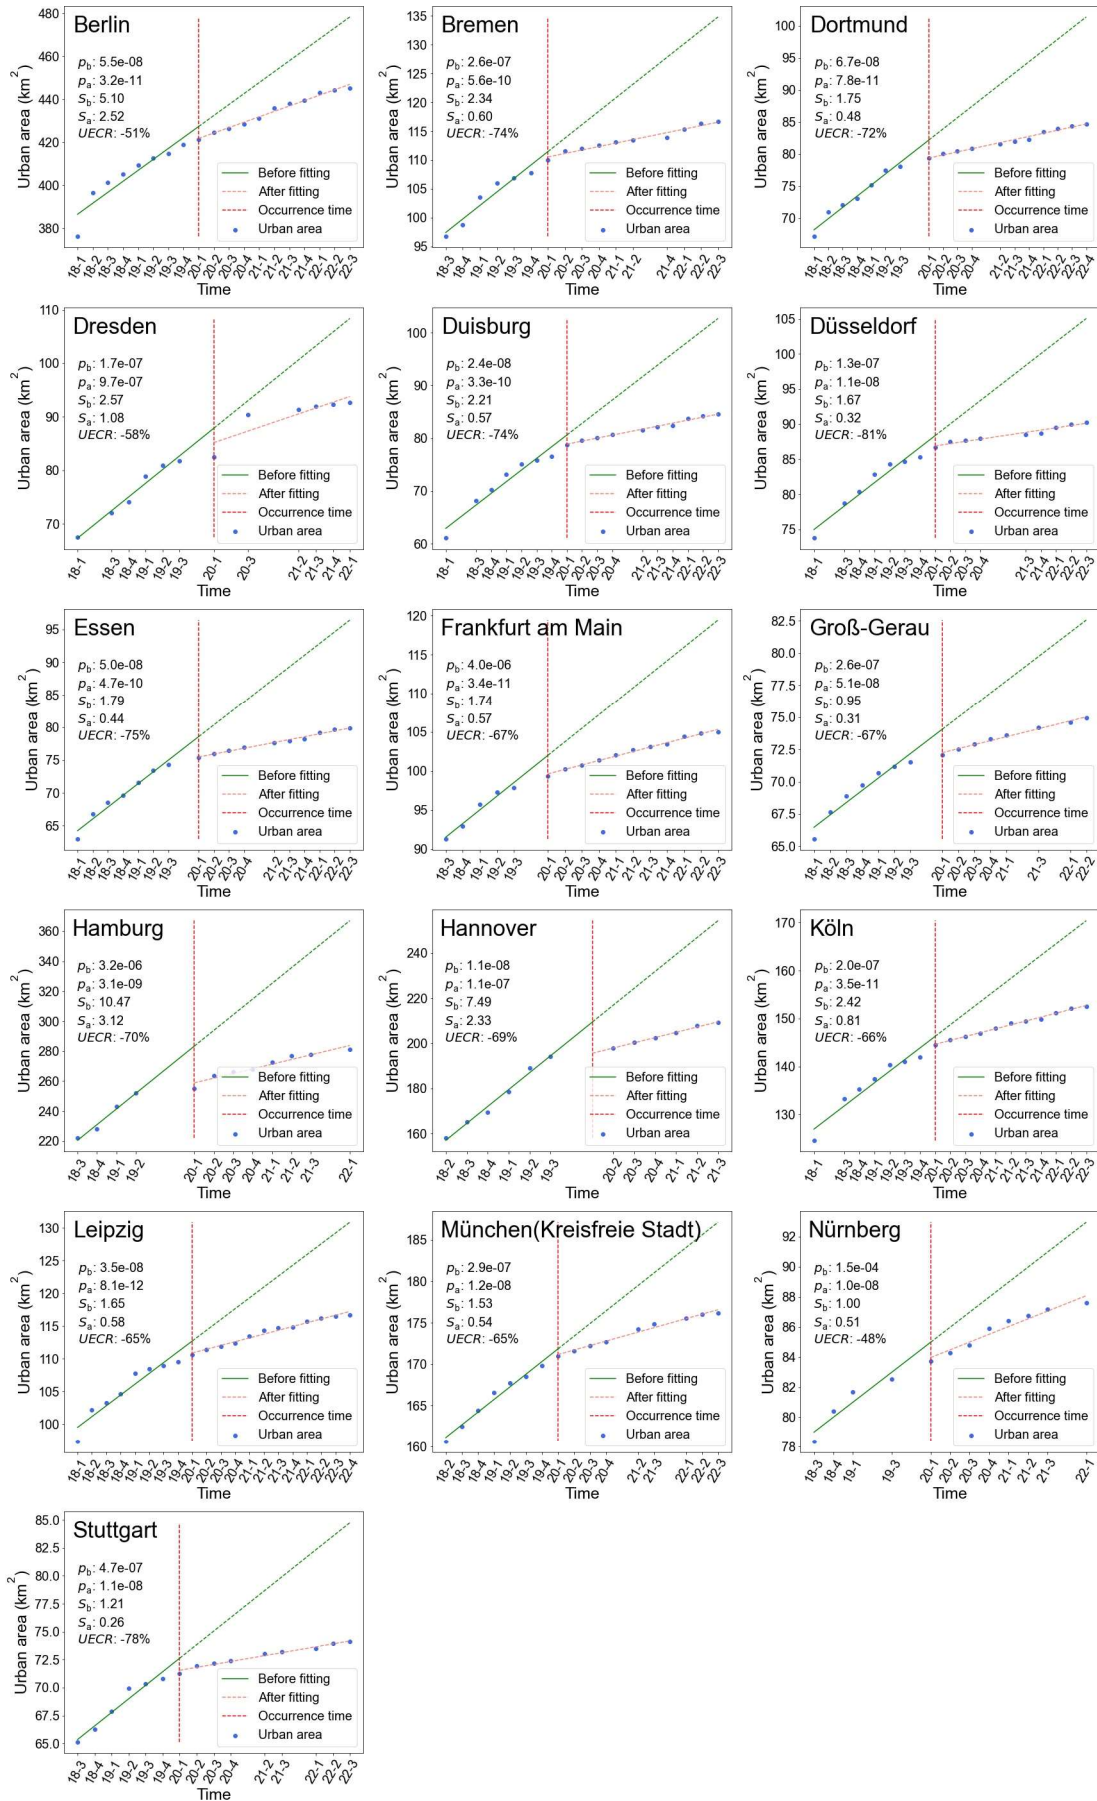

## EU-Greece

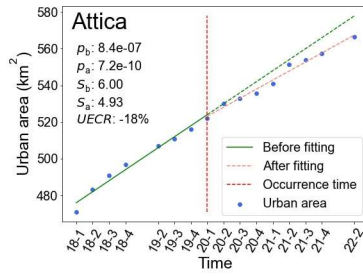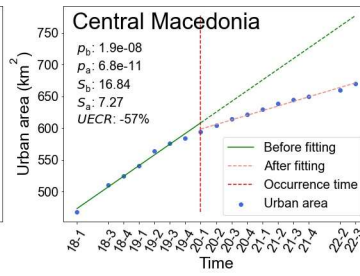

## EU-Hungary

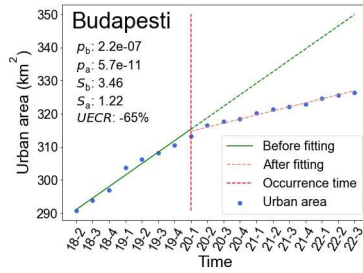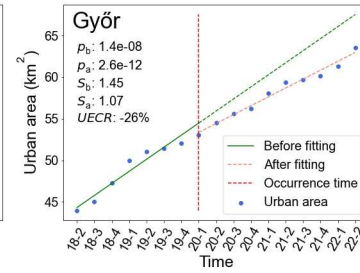

## EU-Ireland

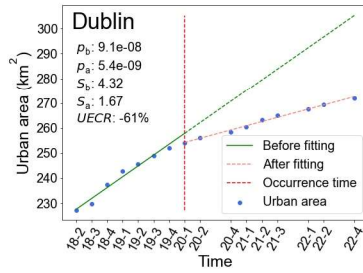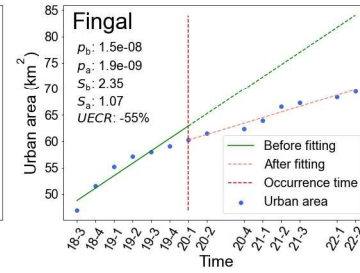

## EU-Italy

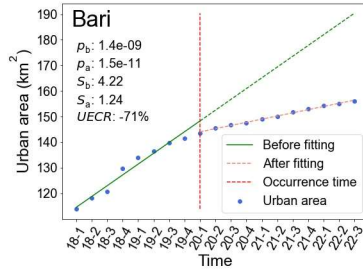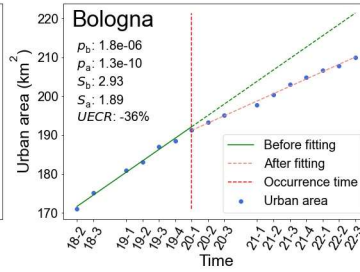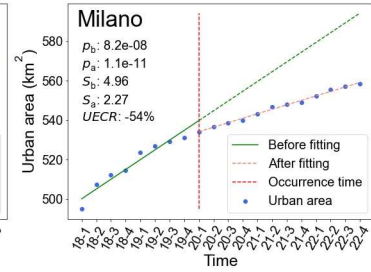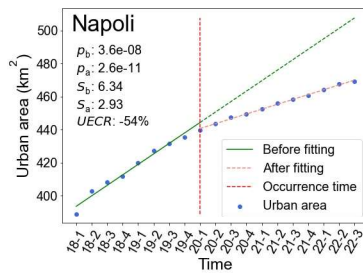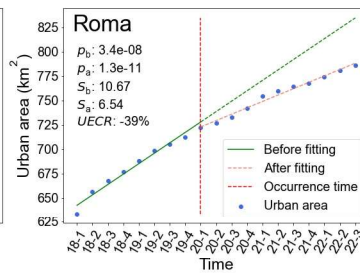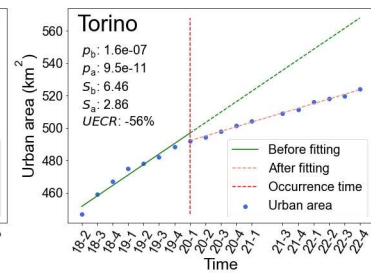

## EU-Kosovo

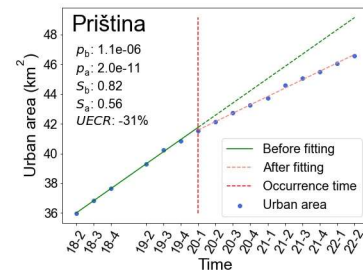

## EU-Latvia

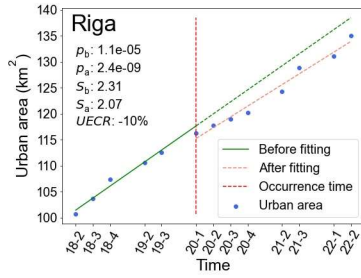

## EU-Lithuania

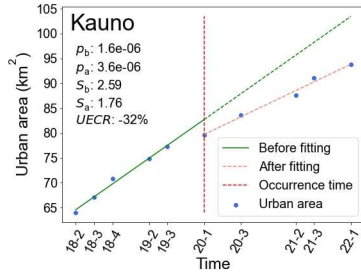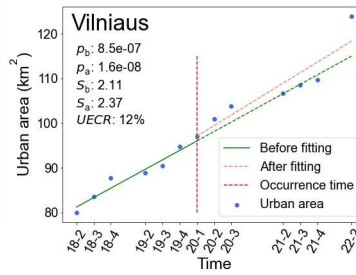

## EU-Luxembourg

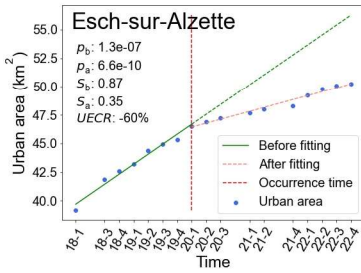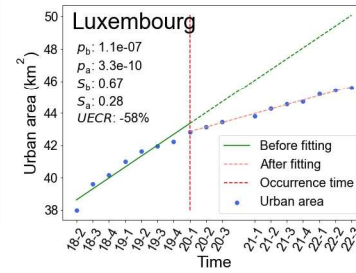

## EU-Moldova

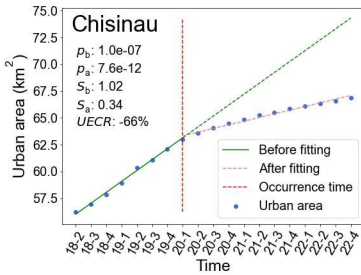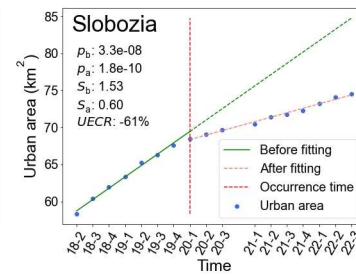

## EU-Netherlands

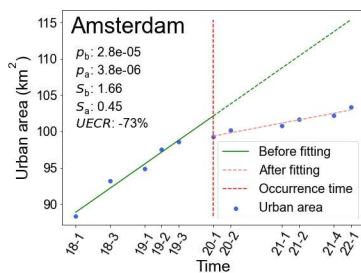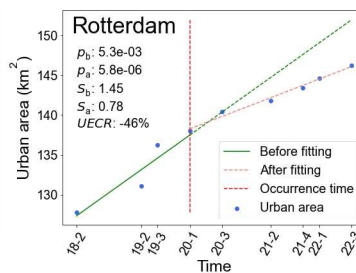

## EU-Norway

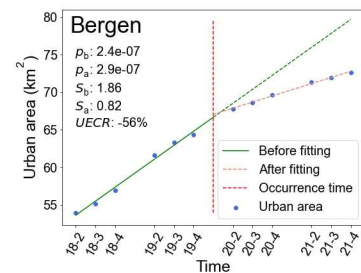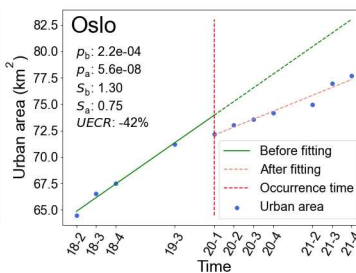

## EU-Poland

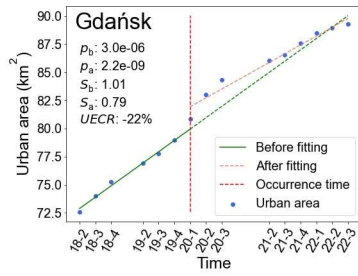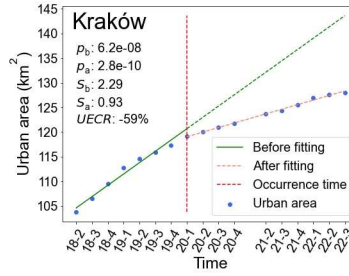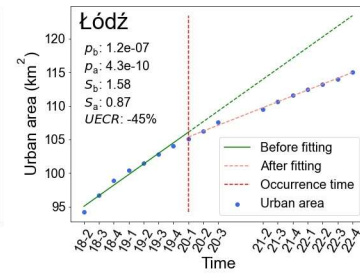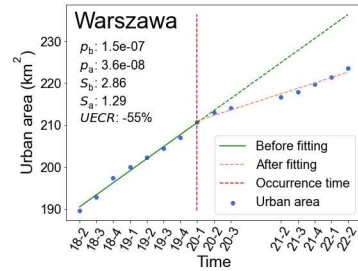

## EU-Portugal

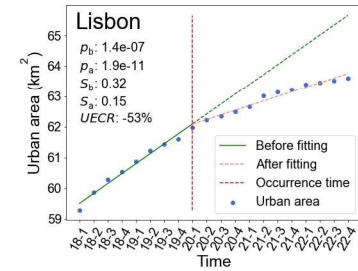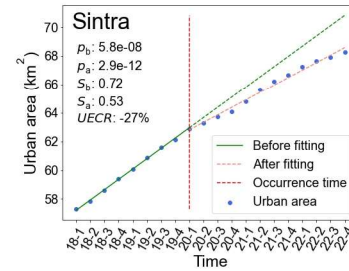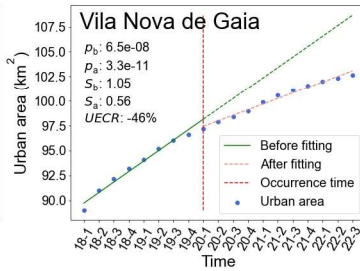

## EU-Romania

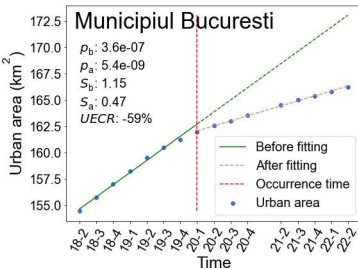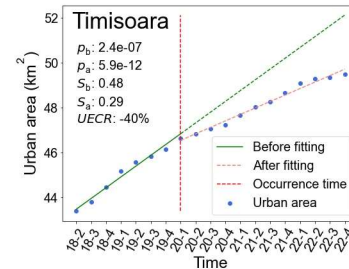

## EU-Russia

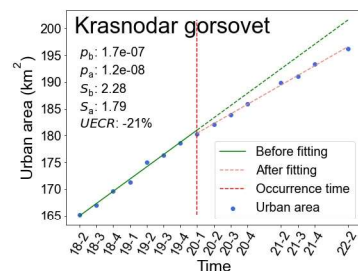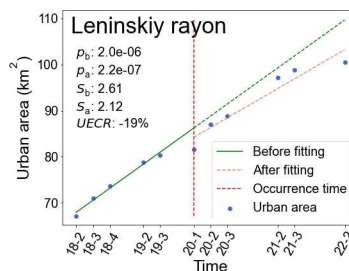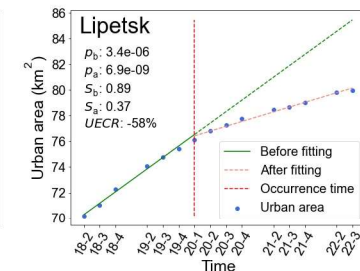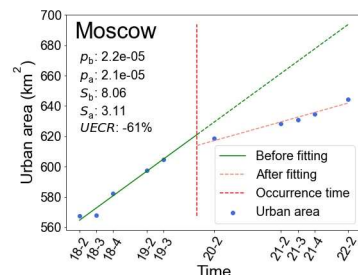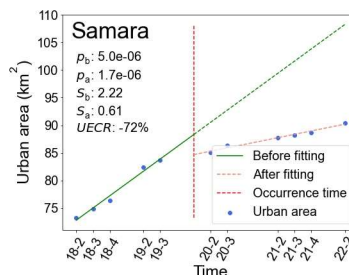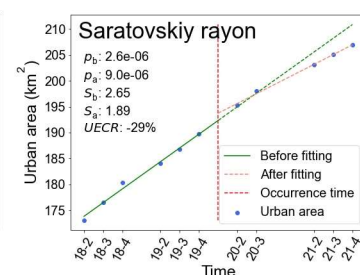

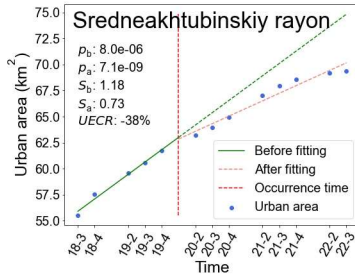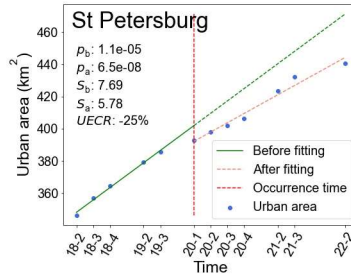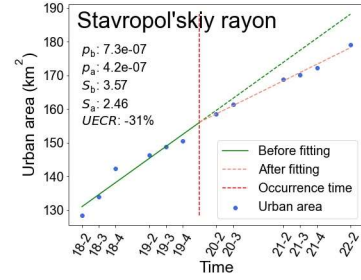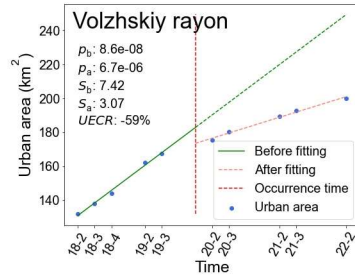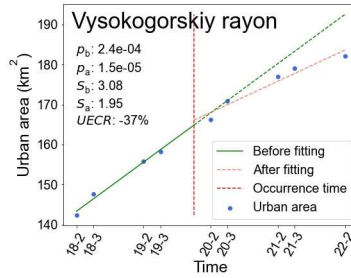

## EU-Serbia

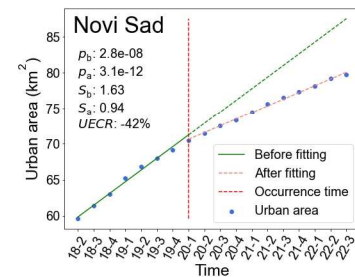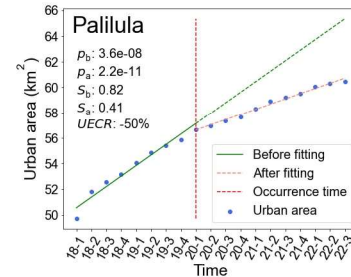

## EU-Slovak Republic

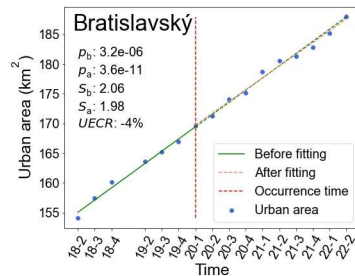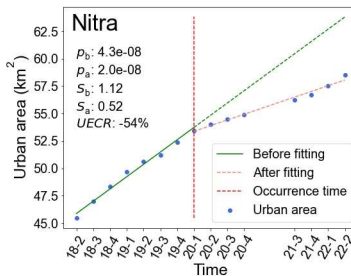

## EU-Slovenia

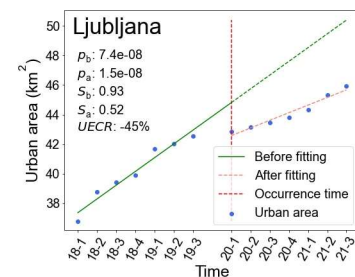

## EU-Spain

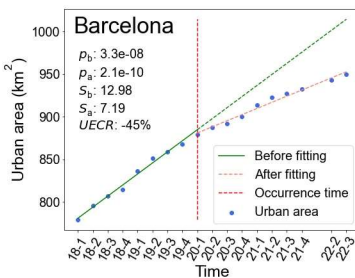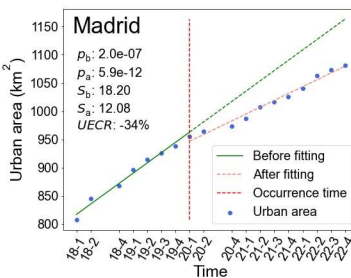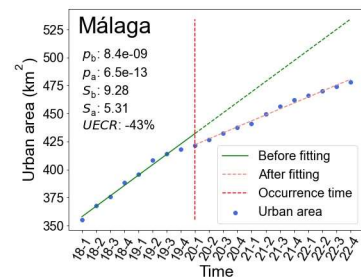

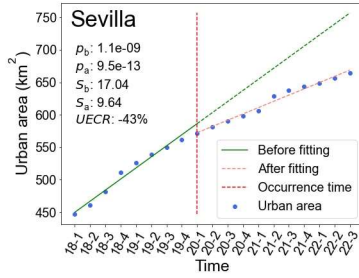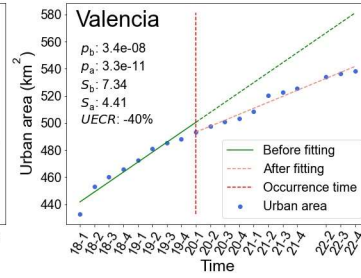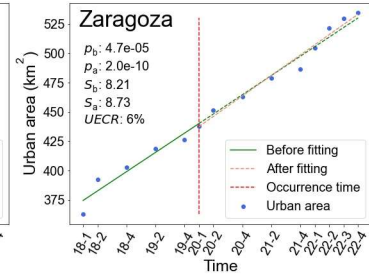

## EU-Sweden

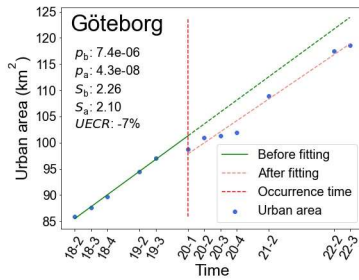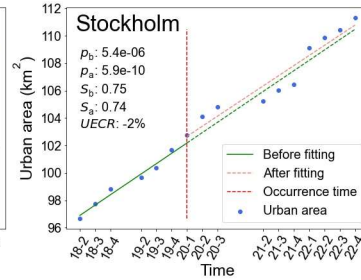

## EU-Switzerland

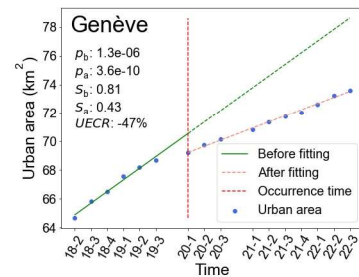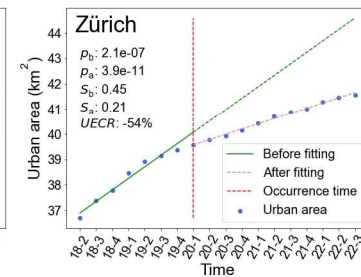

## EU-Turkey

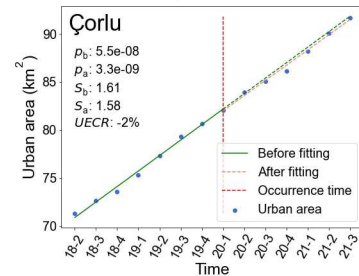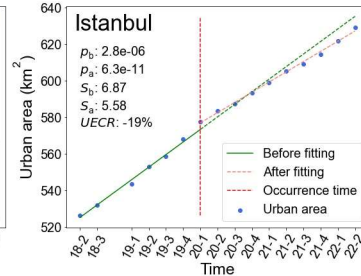

## EU-Ukraine

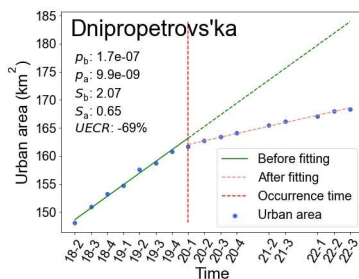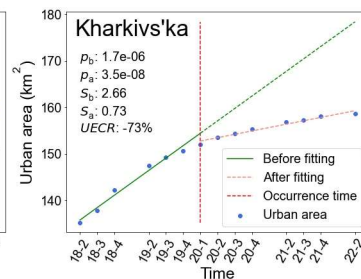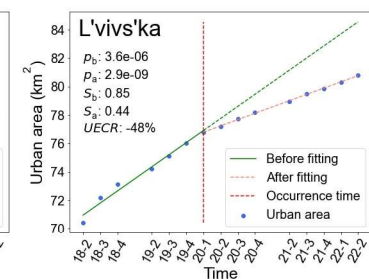

## EU-United Kingdom

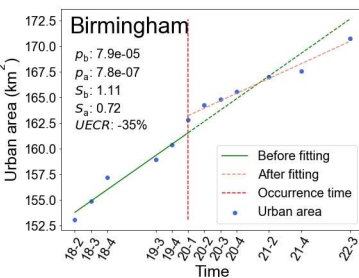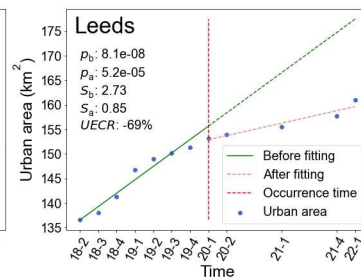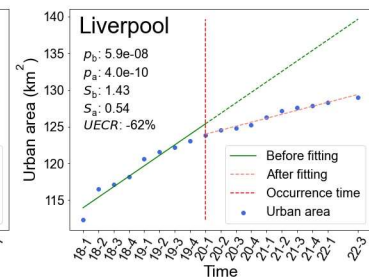

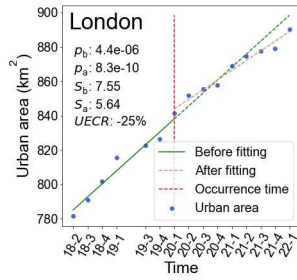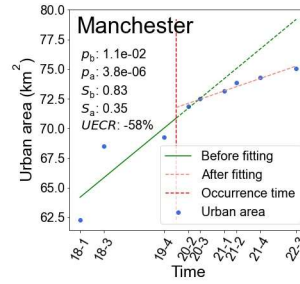

## NA-Canada

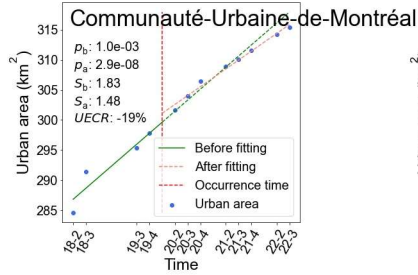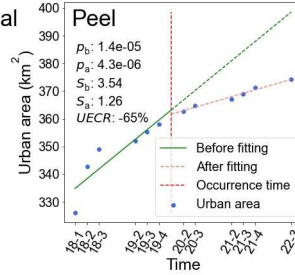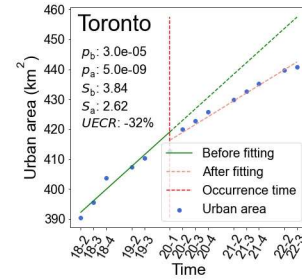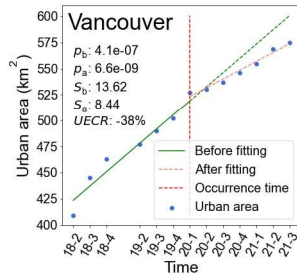

## NA-Dominican Republic

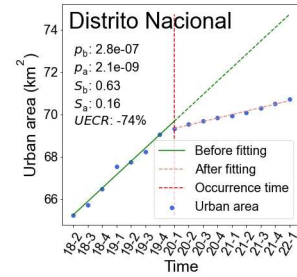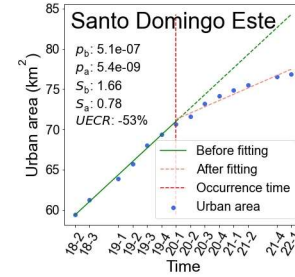

## NA-Haiti

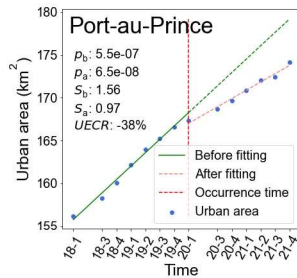

## NA-Honduras

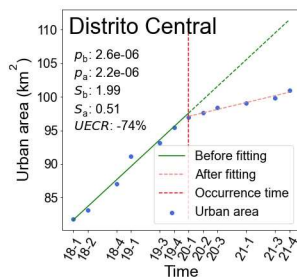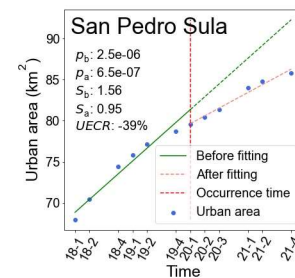

## NA-Mexico

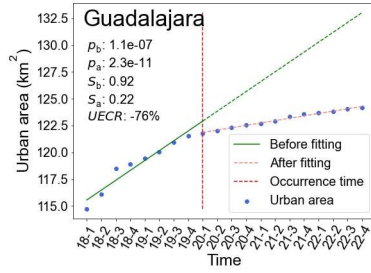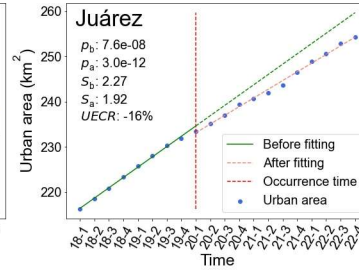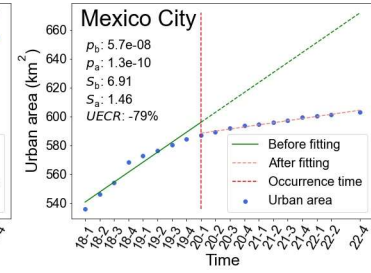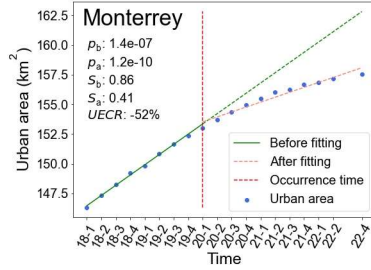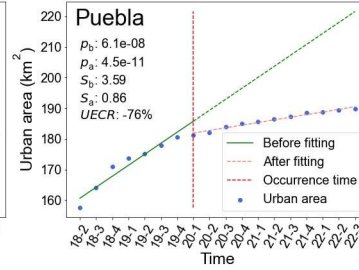

## NA-Nicaragua

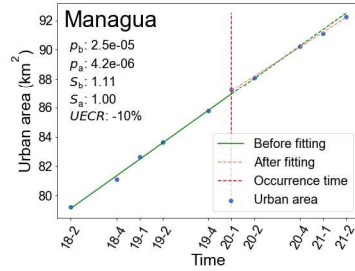

## NA-Panama

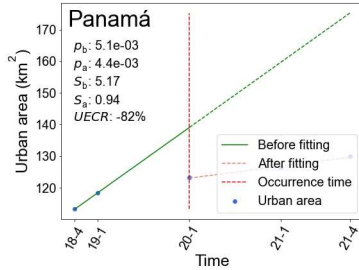

## NA-United States

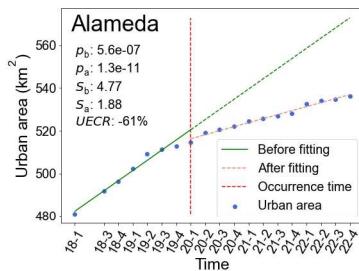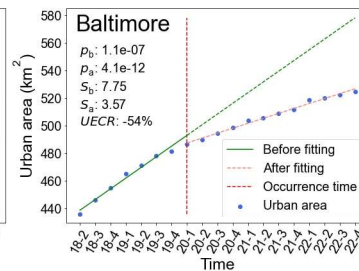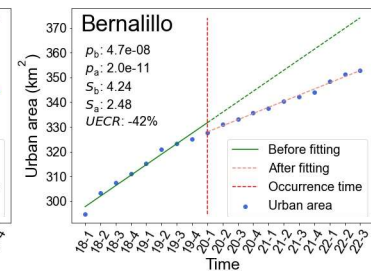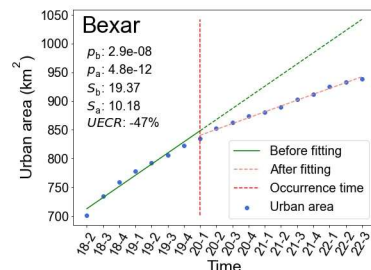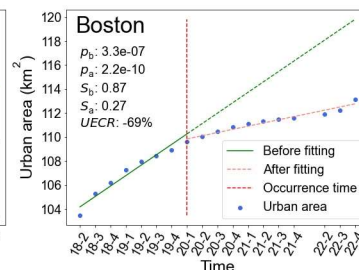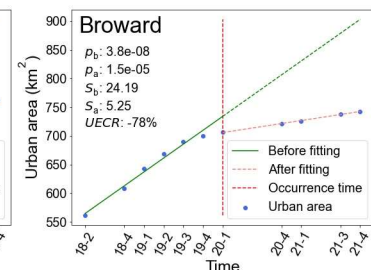

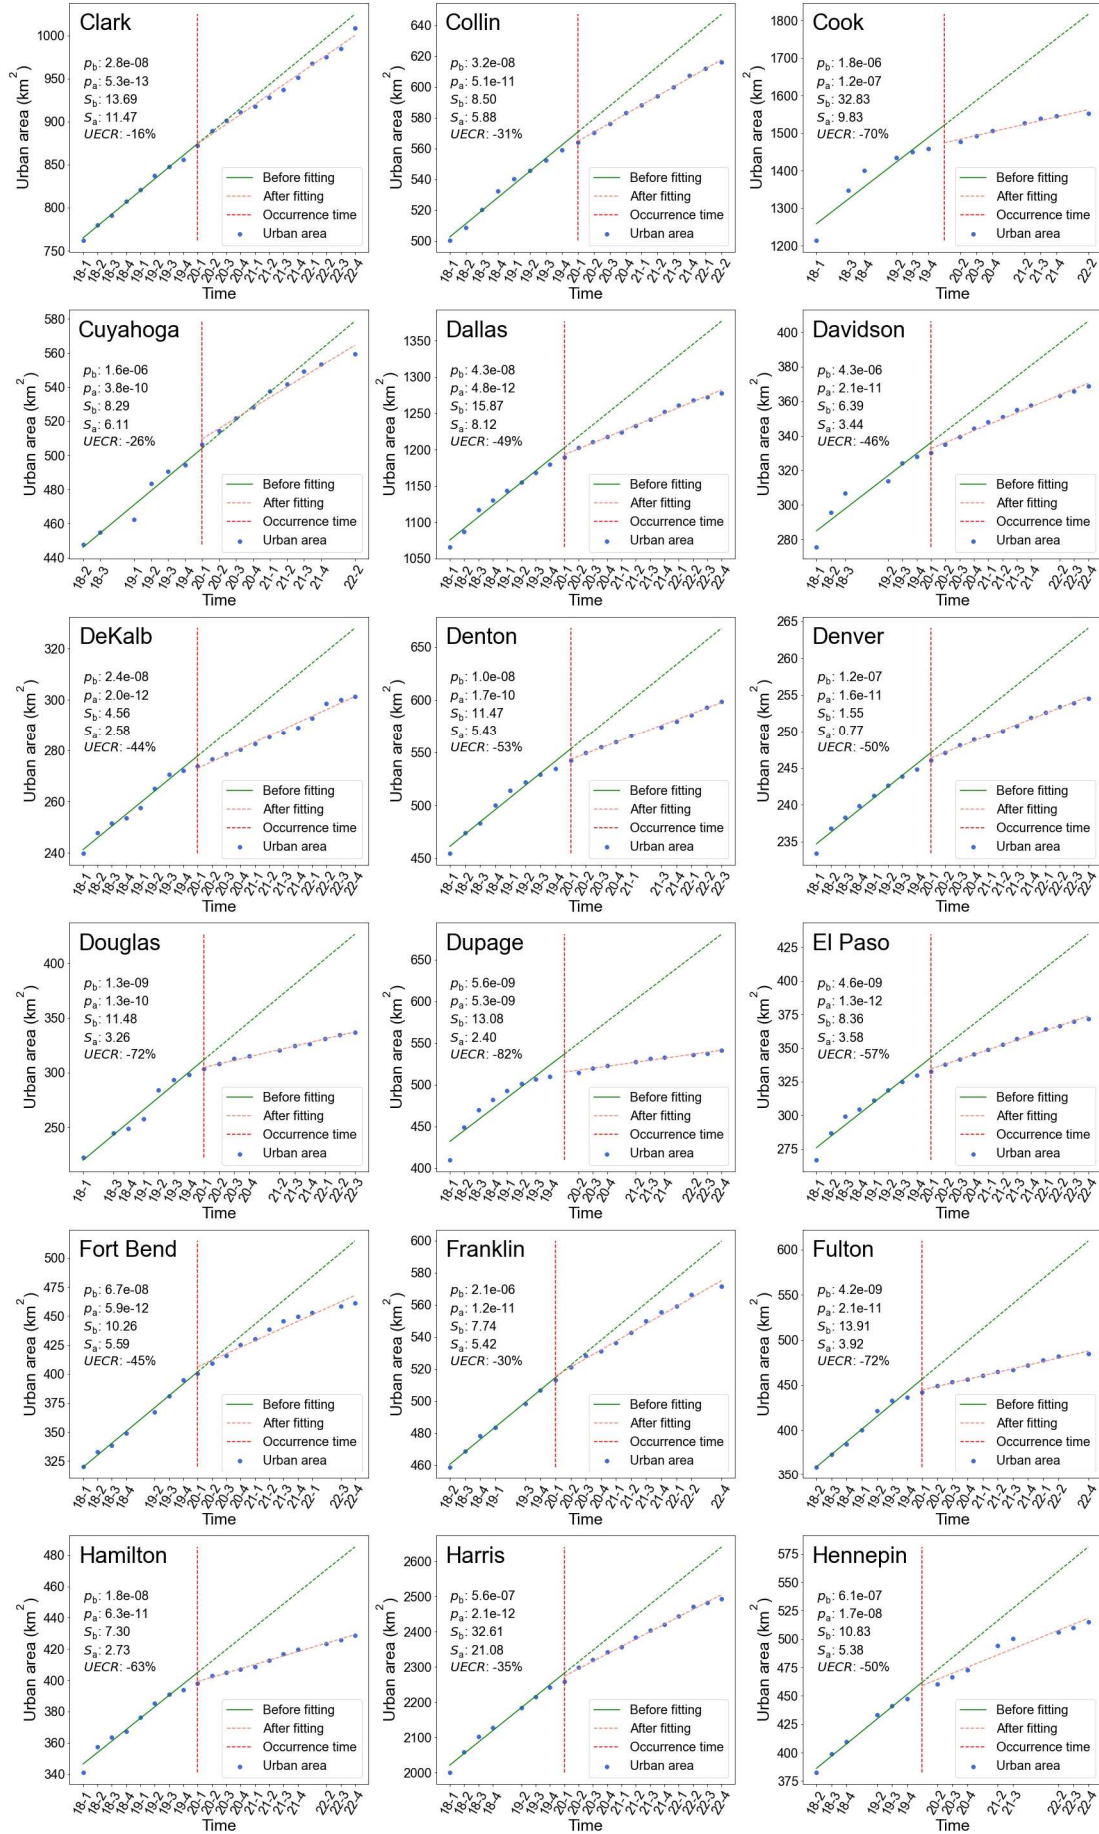

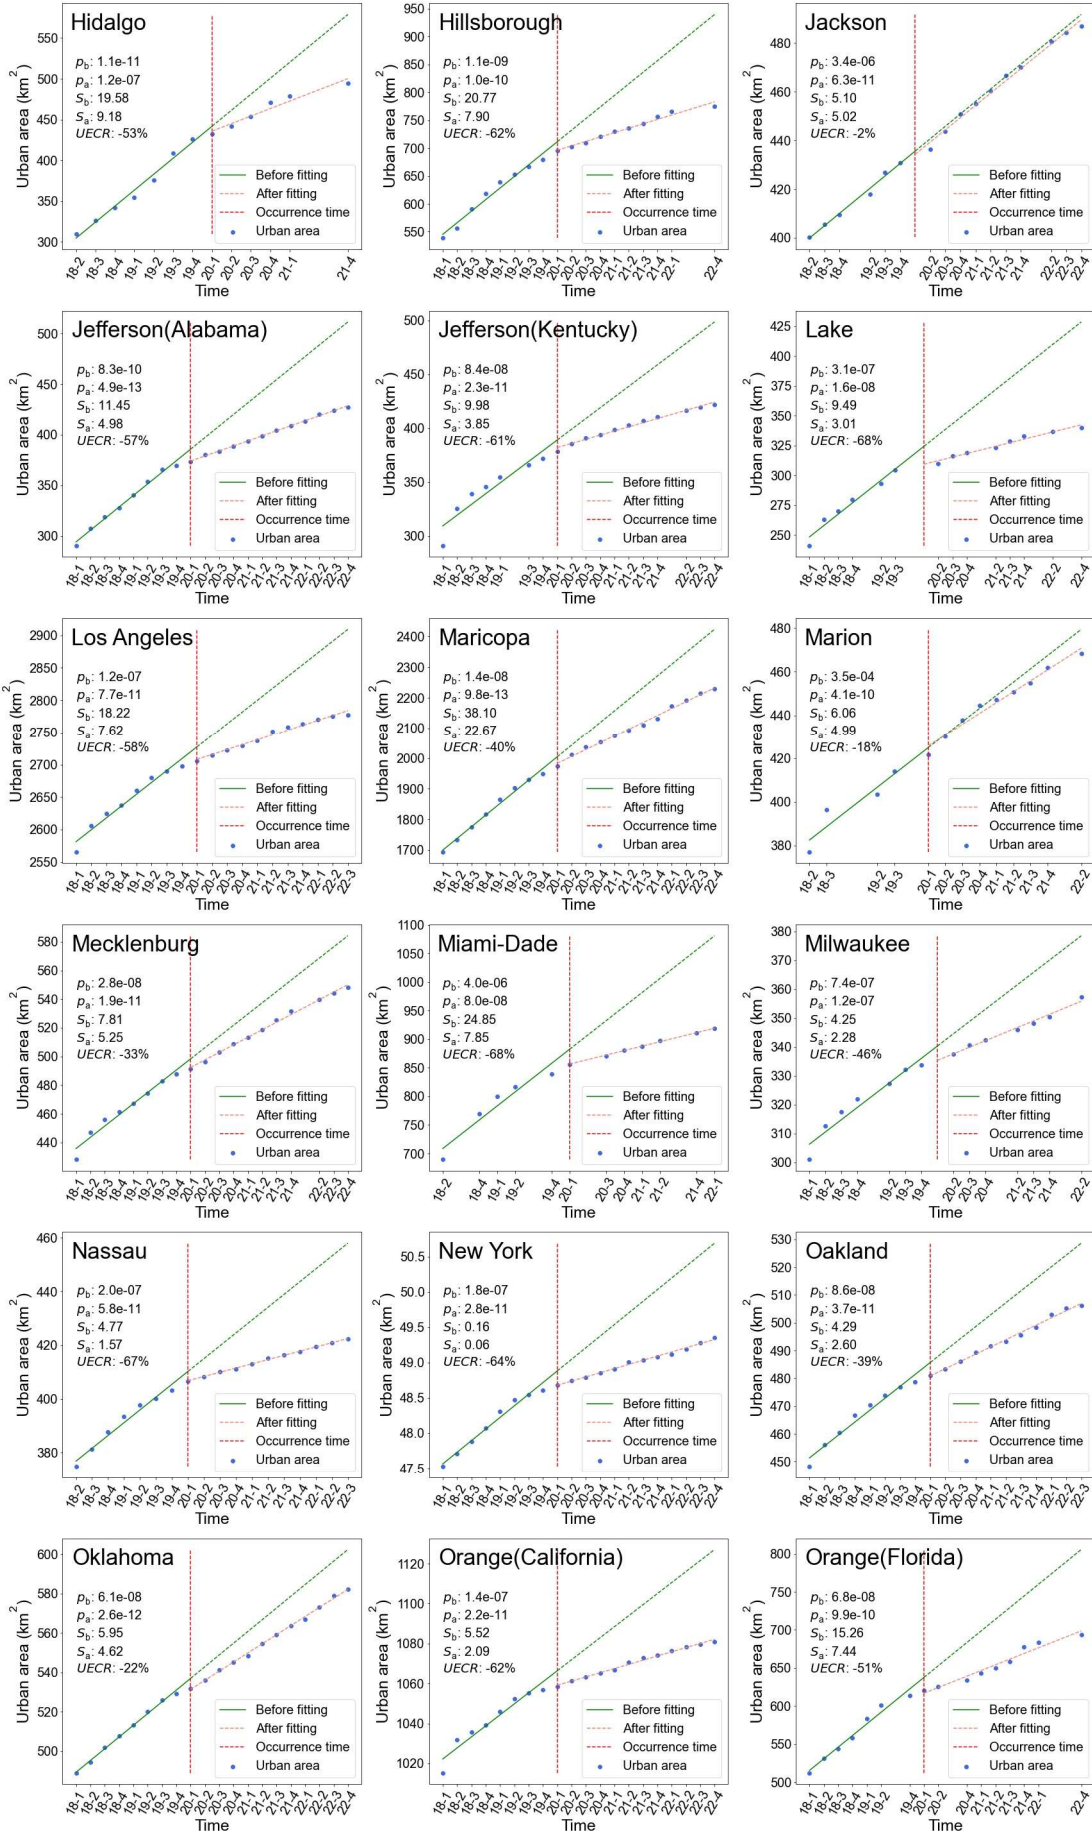

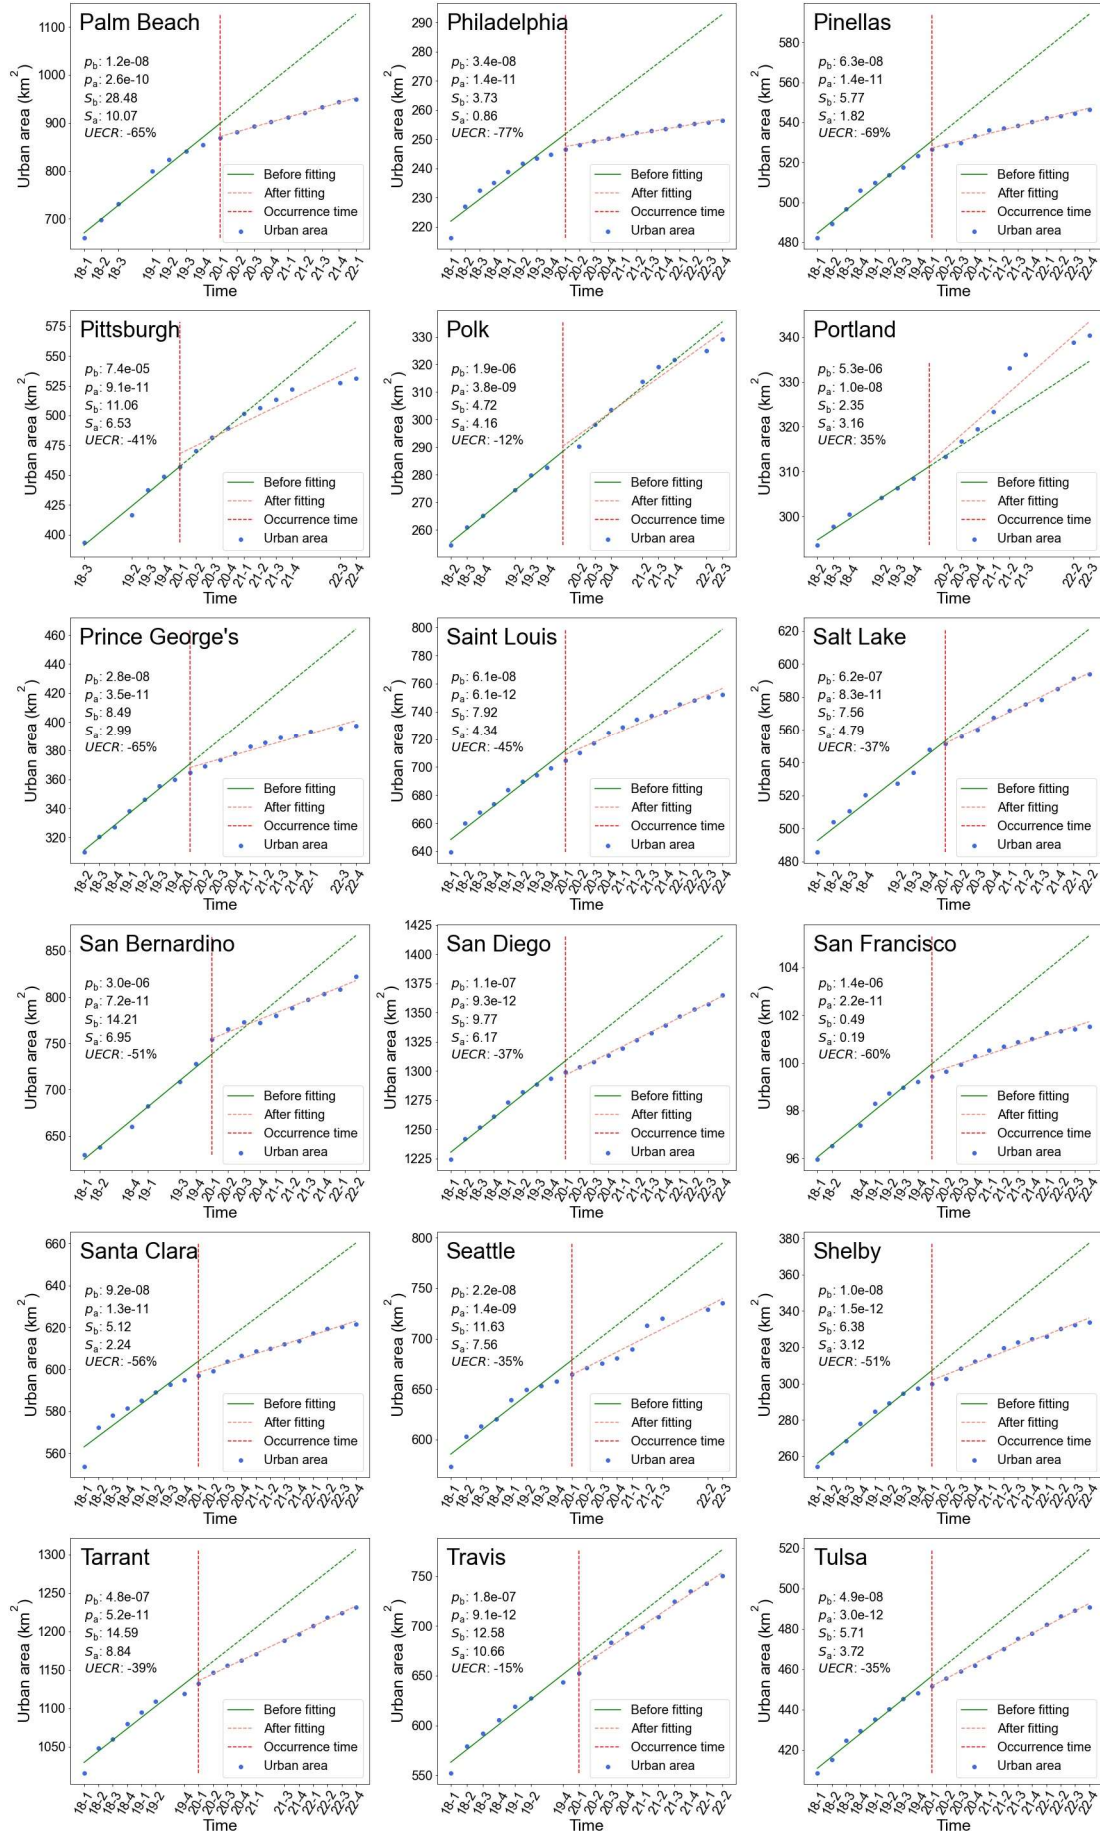

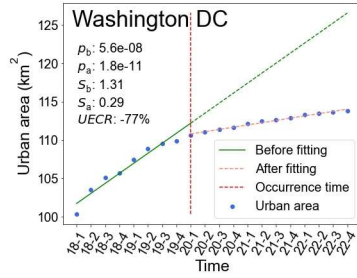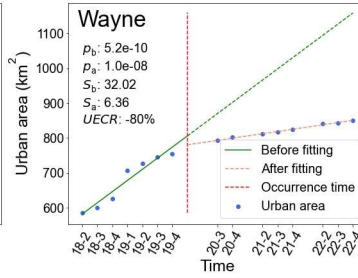

## OA-Australia

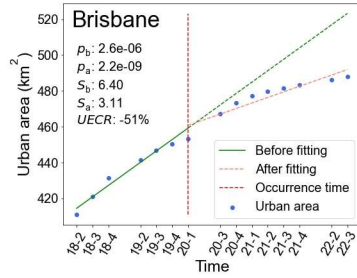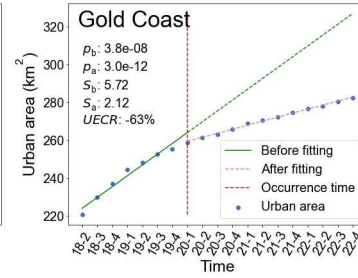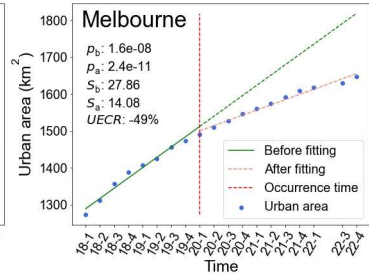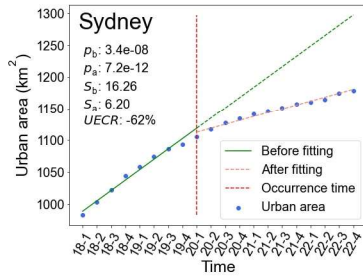

## OA-New Zealand

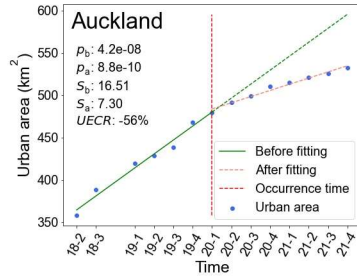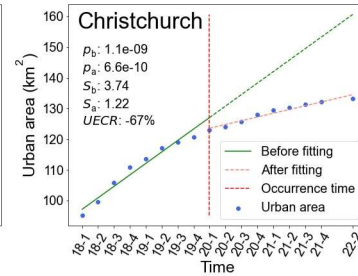

## OA-United States

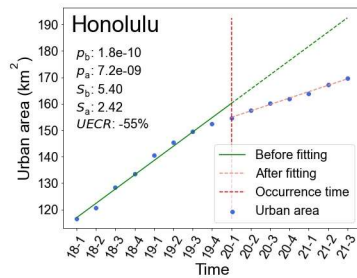

## SA-Argentina

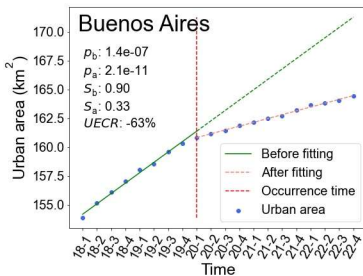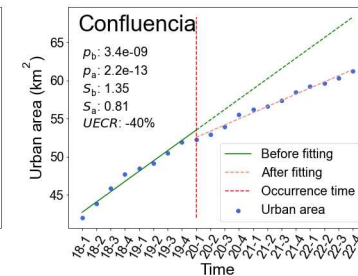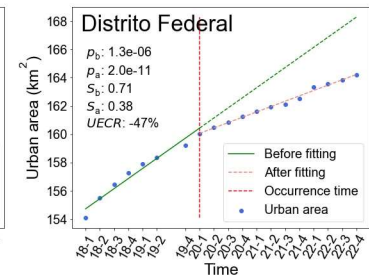

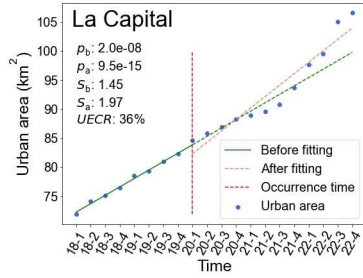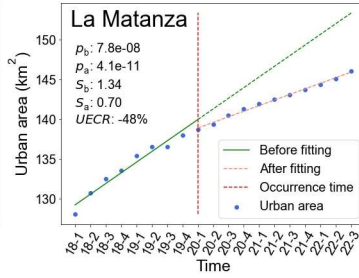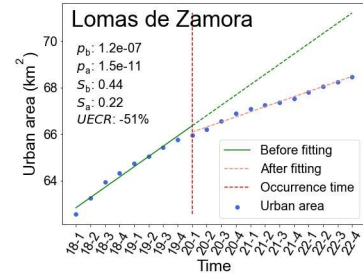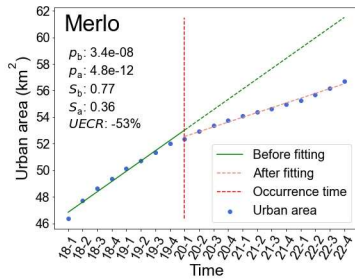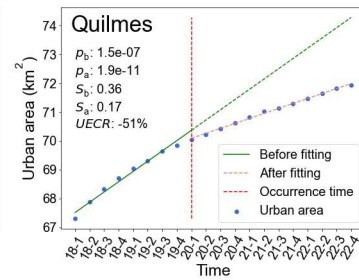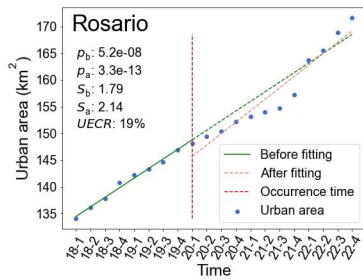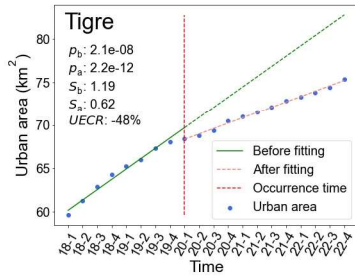

## SA-Bolivia

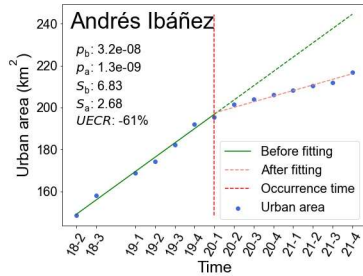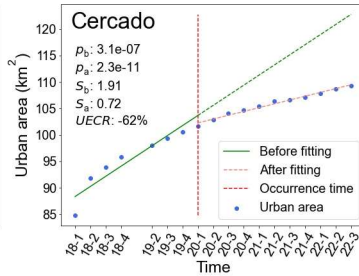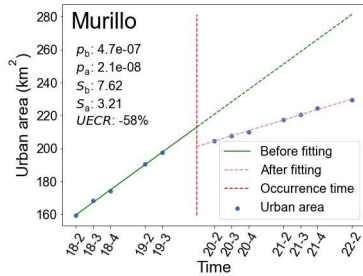

## SA-Brazil

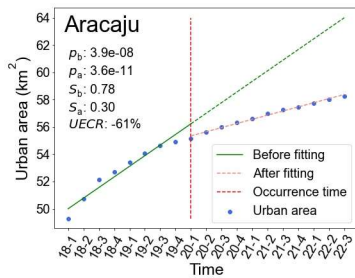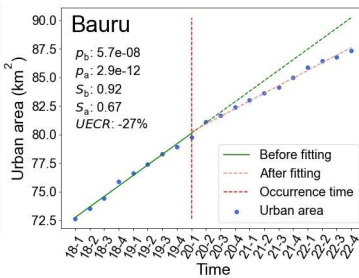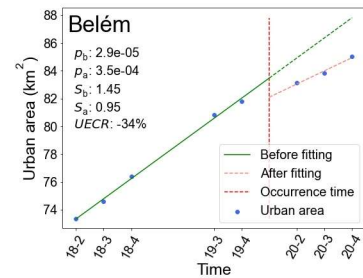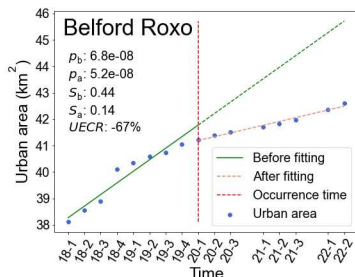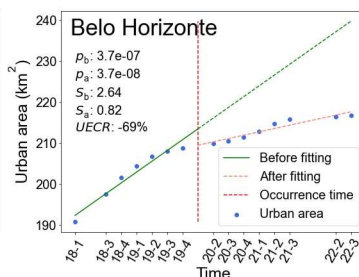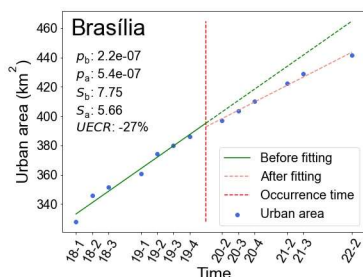

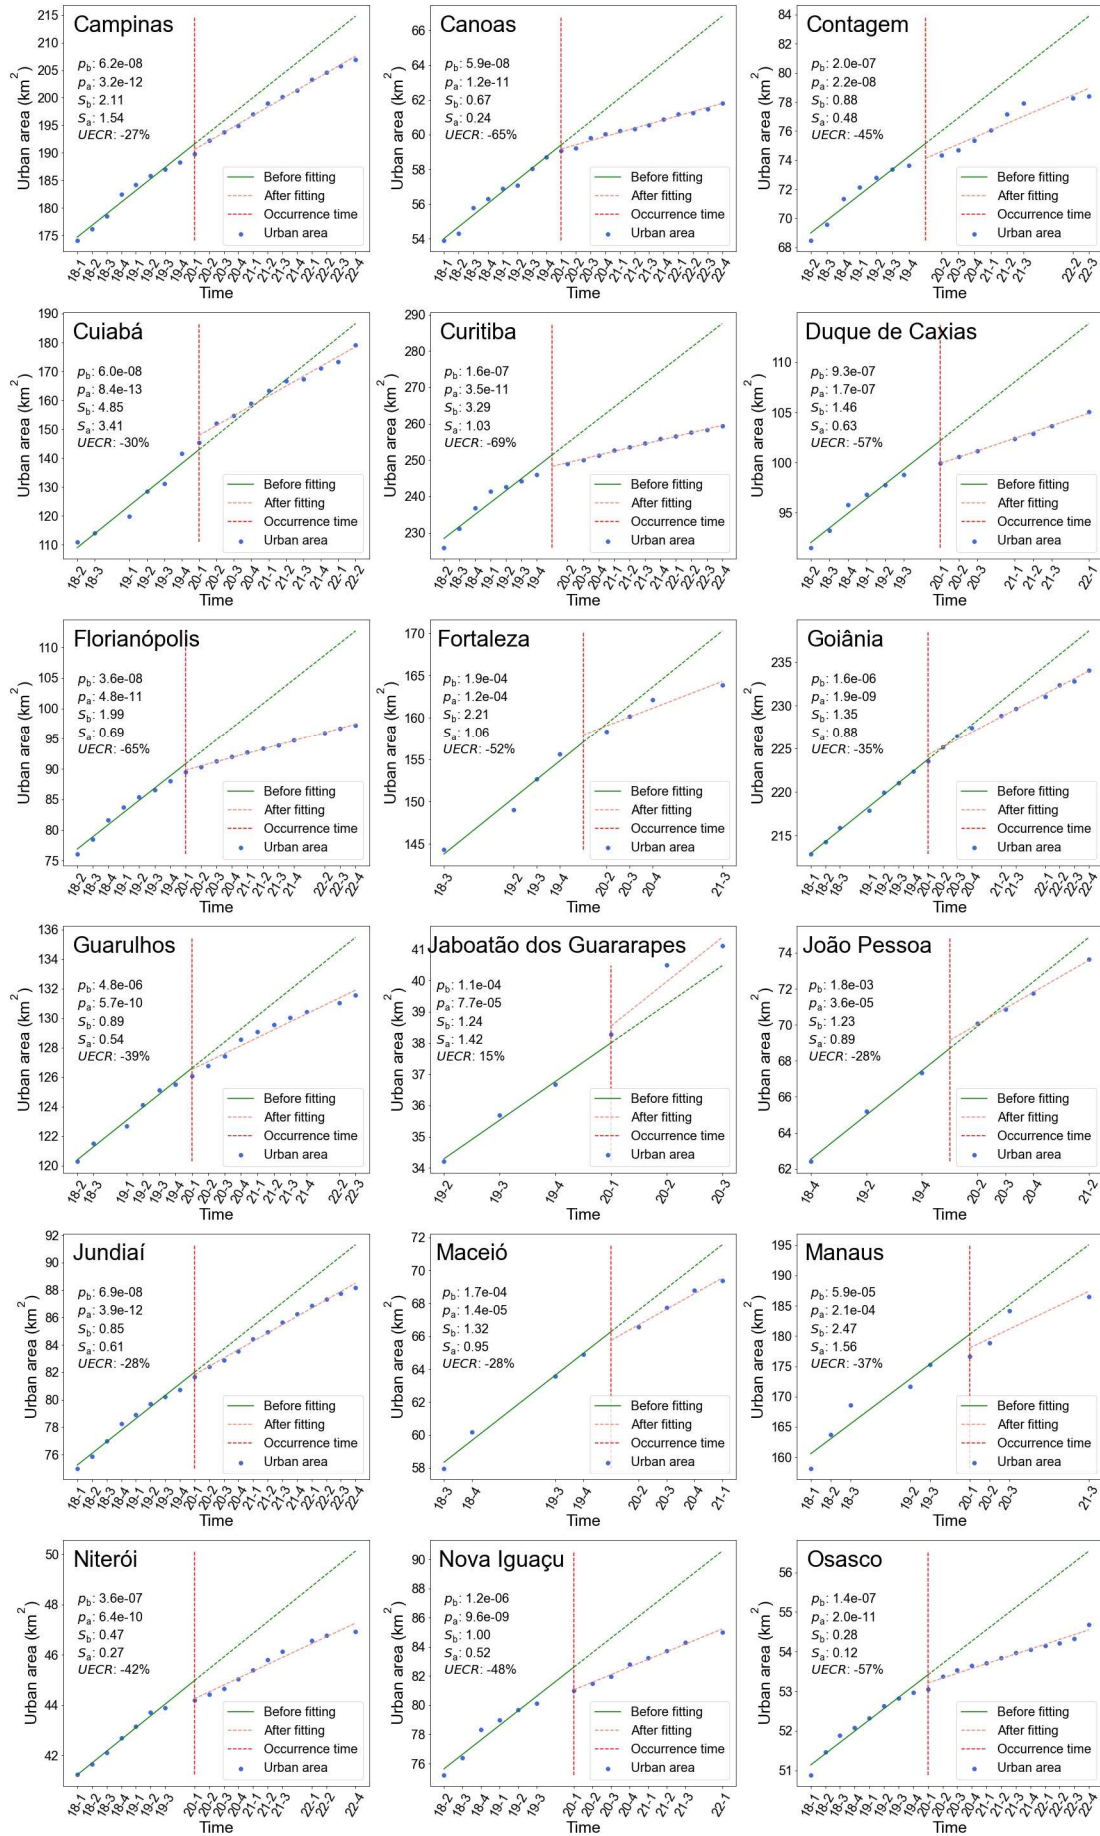

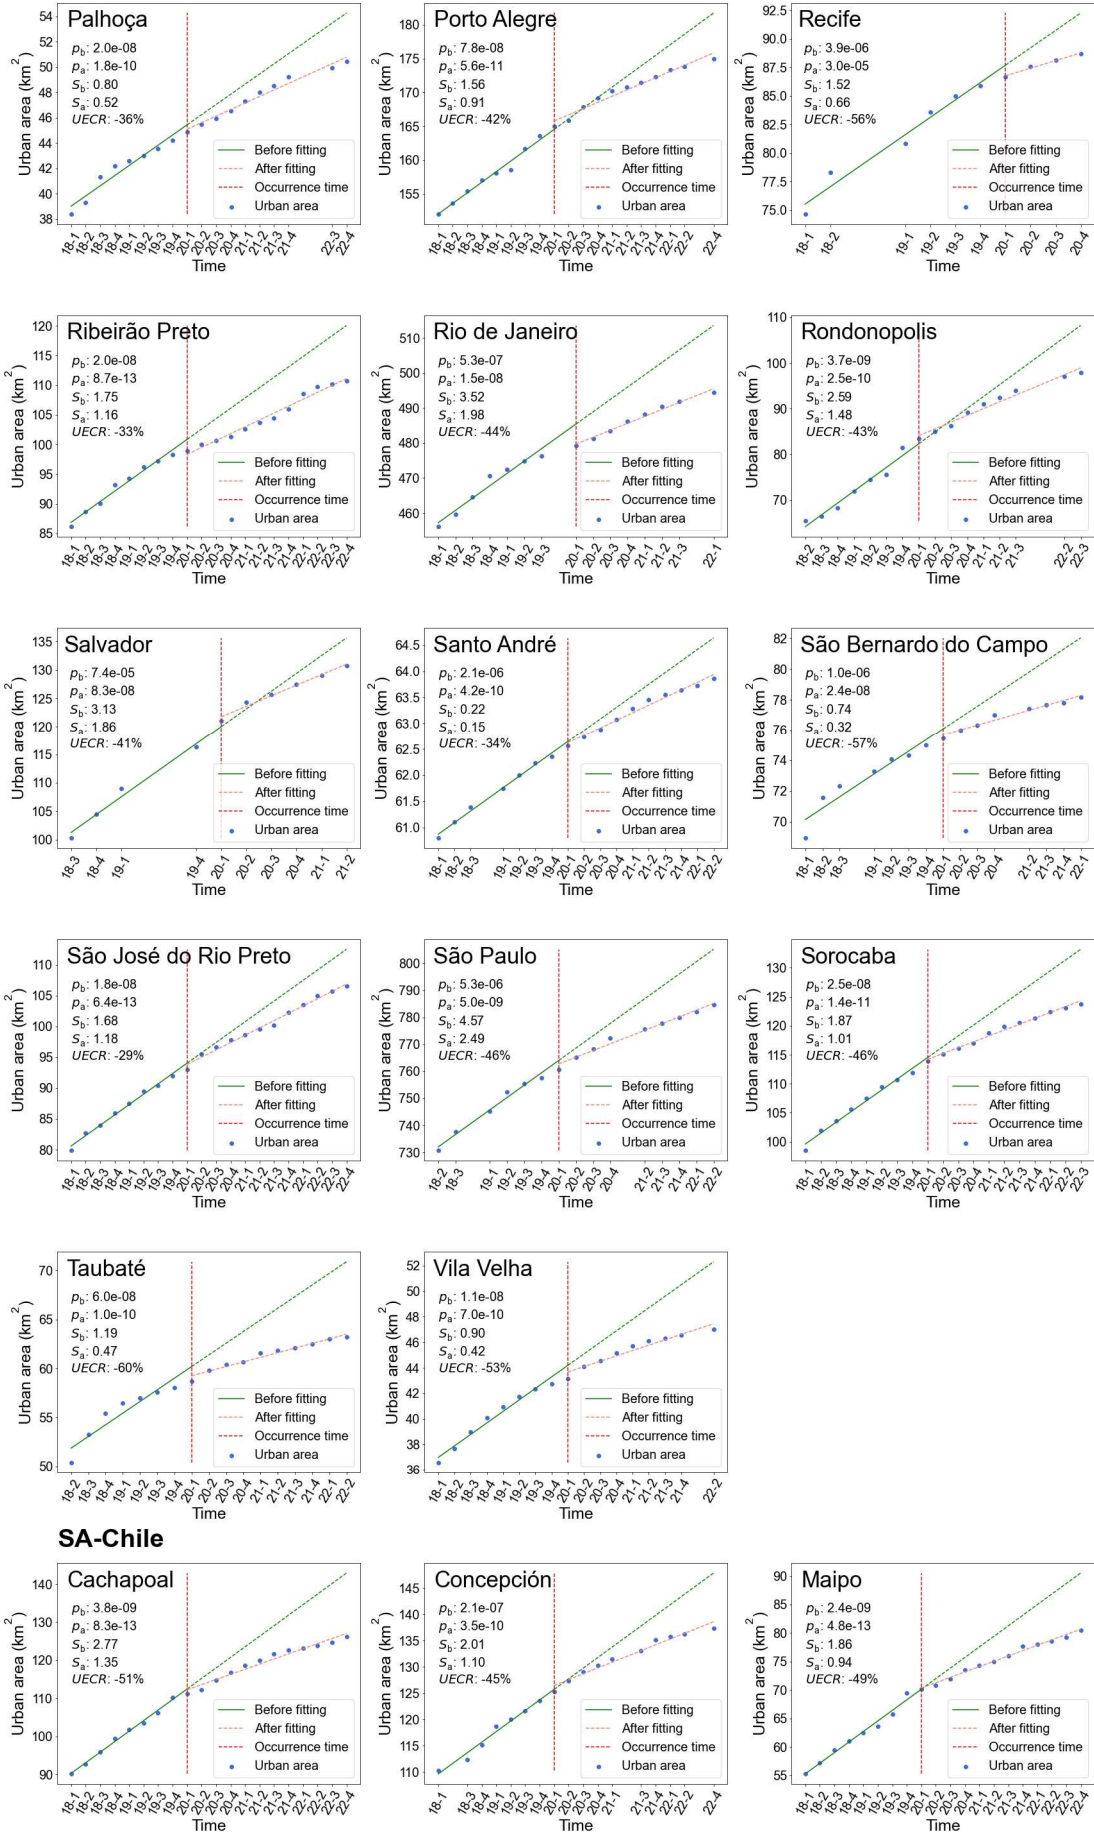

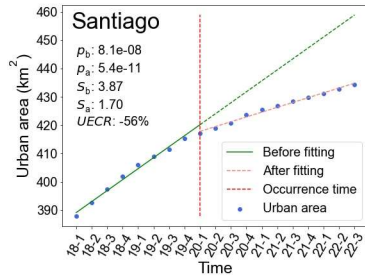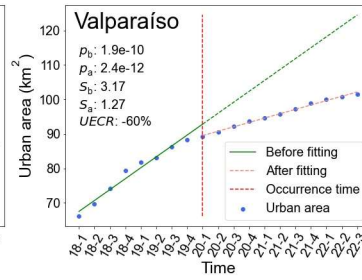

### SA-Colombia

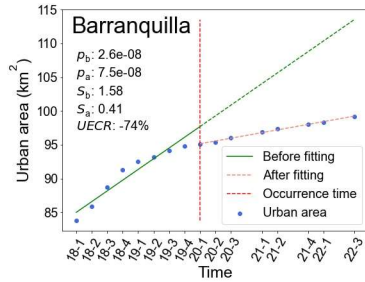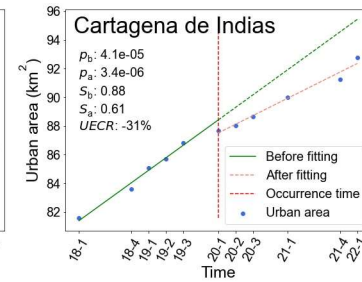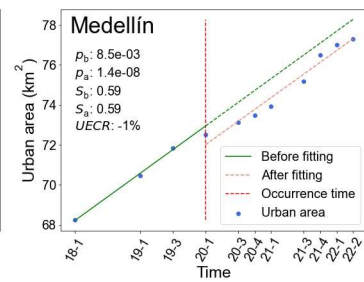

### SA-Panama

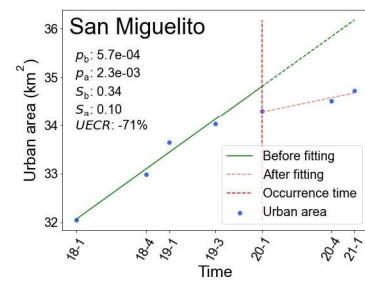

### SA-Paraguay

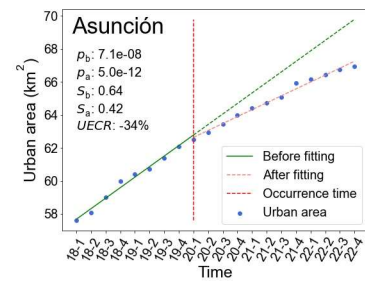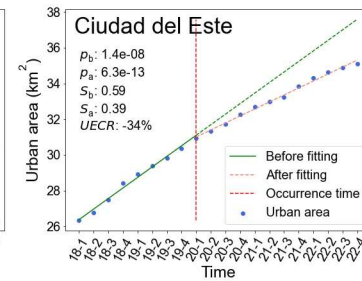

### SA-Peru

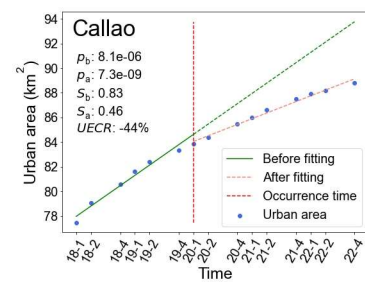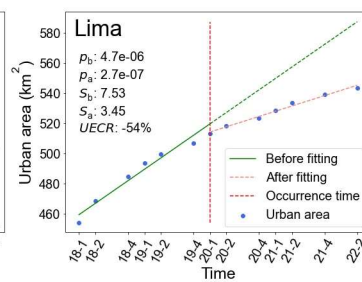

### SA-Uruguay

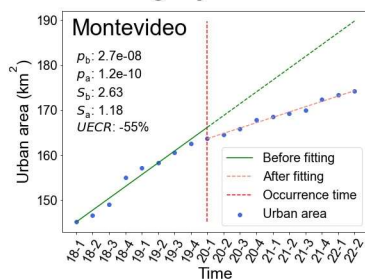

Supplement: Supplementary file 1 [file 9efbf03668bd482b734ede61.pdf]
